# Supplementary material for: Mapping age- and sex-specific HIV prevalence in adults in sub-Saharan Africa, 2000–2018
Source: Springer Nature journal article supplement (doi:10.1186/s12916-022-02639-z), 2022-12-19
Supplement: MOESM3 [file 12916_2022_2639_MOESM3_ESM.pdf]

# 1 Additional File 3: Supplemental Figures

## 2 Mapping age- and sex-specific HIV prevalence in adults in sub- 3 Saharan Africa, 2000–2018

### 4 5 Contents

|    |                                                                                      |    |
|----|--------------------------------------------------------------------------------------|----|
| 6  | Figure S1: Prevalence of male circumcision.....                                      | 3  |
| 7  | Figure S2: Prevalence of signs and symptoms of sexually transmitted infections ..... | 4  |
| 8  | Figure S3: Prevalence of marriage or living as married .....                         | 5  |
| 9  | Figure S4: Prevalence of partner living elsewhere among females.....                 | 6  |
| 10 | Figure S5: Prevalence of condom use during most recent sexual encounter .....        | 7  |
| 11 | Figure S6: Prevalence of sexual activity among young females .....                   | 8  |
| 12 | Figure S7: Prevalence of multiple partners among males in the past year .....        | 9  |
| 13 | Figure S8: Prevalence of multiple partners among females in the past year .....      | 10 |
| 14 | Figure S9: HIV prevalence predictions from the boosted regression tree model .....   | 11 |
| 15 | Figure S10: HIV prevalence predictions from the generalized additive model .....     | 12 |
| 16 | Figure S11: HIV prevalence predictions from the lasso regression model .....         | 13 |
| 17 | Figure S12: Modeling regions .....                                                   | 14 |
| 18 | Figure S13: Age- and sex-specific vs. adult prevalence modeling .....                | 15 |
| 19 | Figure S14: Data sensitivity.....                                                    | 16 |
| 20 | Figure S15: Model specification validation.....                                      | 17 |
| 21 | Figure S16: Modeled and re-aggregated adult prevalence comparison .....              | 18 |
| 22 | Figure S17: HIV prevalence raking factors for males.....                             | 19 |
| 23 | Figure S18: HIV prevalence raking factors for females.....                           | 20 |
| 24 | Figure S19: Age-specific HIV prevalence in males, 2000 .....                         | 21 |
| 25 | Figure S20: Age-specific HIV prevalence in females, 2000 .....                       | 23 |
| 26 | Figure S21: Age-specific HIV prevalence in males, 2005 .....                         | 25 |
| 27 | Figure S22: Age-specific HIV prevalence in females, 2005 .....                       | 27 |
| 28 | Figure S23: Age-specific HIV prevalence in males, 2010 .....                         | 29 |
| 29 | Figure S24: Age-specific HIV prevalence in females, 2010 .....                       | 31 |
| 30 | Figure S25: Age-specific HIV prevalence in males, 2018 .....                         | 33 |
| 31 | Figure S26: Age-specific HIV prevalence in females, 2018 .....                       | 35 |

32 Figure S27: Age-specific uncertainty interval range estimates in males, 2000 ..... 37

33 Figure S28: Age-specific uncertainty interval range estimates in females, 2000 ..... 39

34 Figure S29: Age-specific uncertainty interval range estimates in males, 2005 ..... 41

35 Figure S30: Age-specific uncertainty interval range estimates in females, 2005 ..... 43

36 Figure S31: Age-specific uncertainty interval range estimates in males, 2010 ..... 45

37 Figure S32: Age-specific uncertainty interval range estimates in females, 2010 ..... 47

38 Figure S33: Age-specific uncertainty interval range estimates in males, 2018 ..... 49

39 Figure S34: Age-specific uncertainty interval range estimates in females, 2018 ..... 51

40 Figure S35: Change in HIV prevalence in males, 2000–2005..... 53

41 Figure S36: Change in HIV prevalence in females, 2000–2005..... 55

42 Figure S37: Change in HIV prevalence in males, 2005–2010..... 57

43 Figure S38: Change in HIV prevalence in females, 2005–2010..... 59

44 Figure S39: Change in HIV prevalence in males, 2010–2018..... 61

45 Figure S40: Change in HIV prevalence in females, 2010–2018..... 63

46 Figure S41: Spatial mesh for geostatistical models ..... 65

47 Figure S1: Prevalence of male circumcision

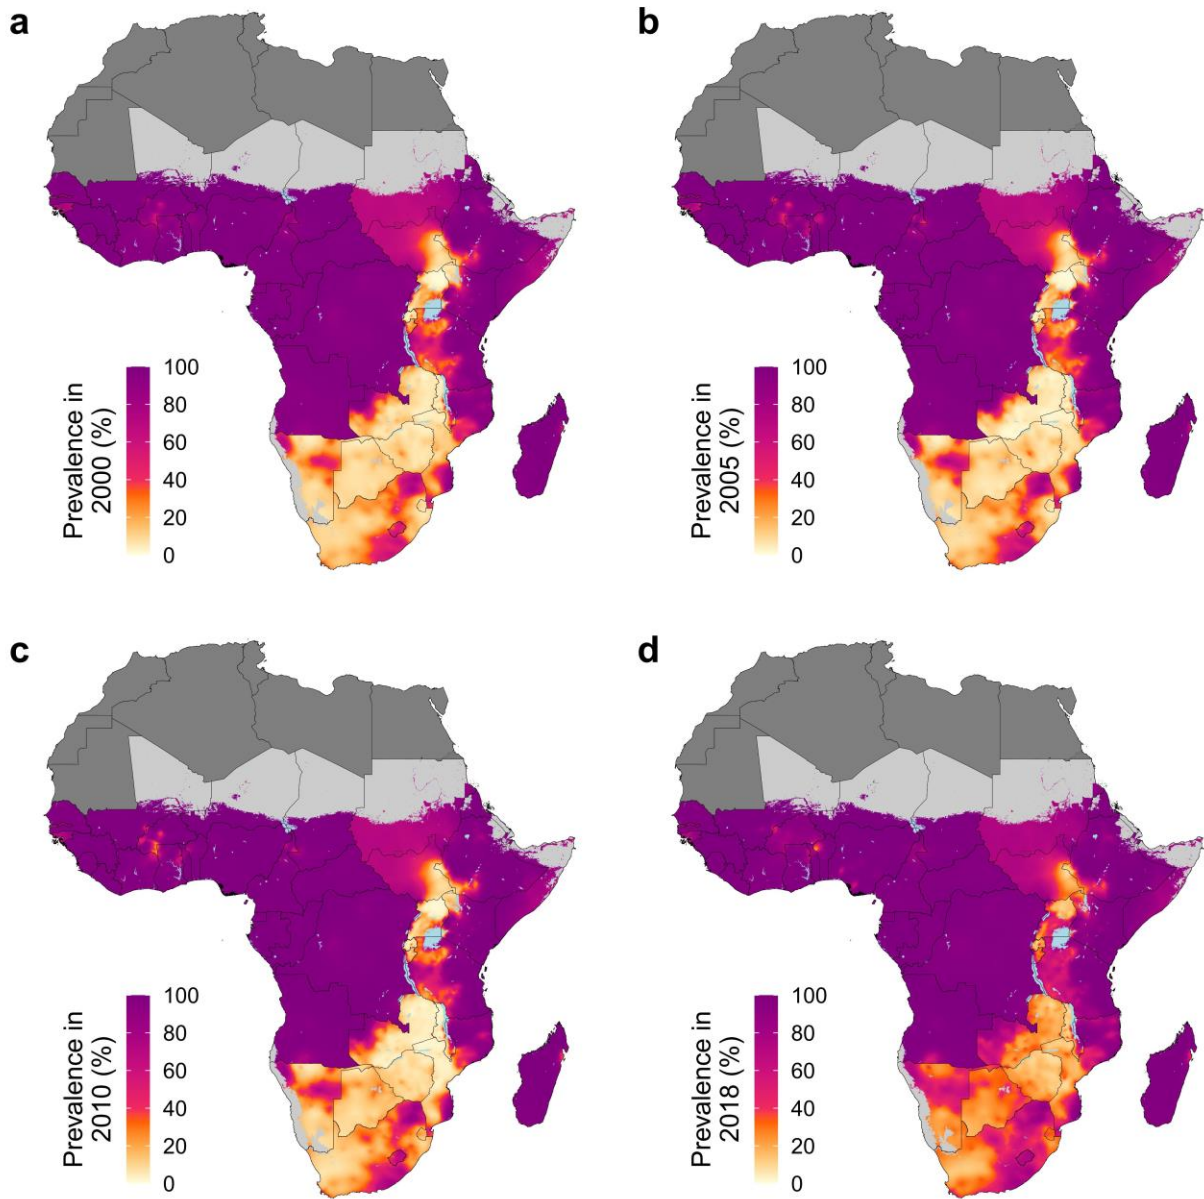

48  
49 **Figure S1: Prevalence of male circumcision.** Prevalence of male circumcision, including medical or  
50 traditional circumcision, among males ages 15–49 years at the 5 x 5-km grid cell level in (a) 2000, (b)  
51 2005, (c) 2010, and (d) 2018. Maps reflect administrative boundaries, land cover, lakes, and population;  
52 grid cells with fewer than ten people per 1 x 1-km and classified as “barren or sparsely vegetated” are  
53 colored in light grey. Countries colored in dark grey were not included in the analysis.

54 Figure S2: Prevalence of signs and symptoms of sexually transmitted  
55 infections

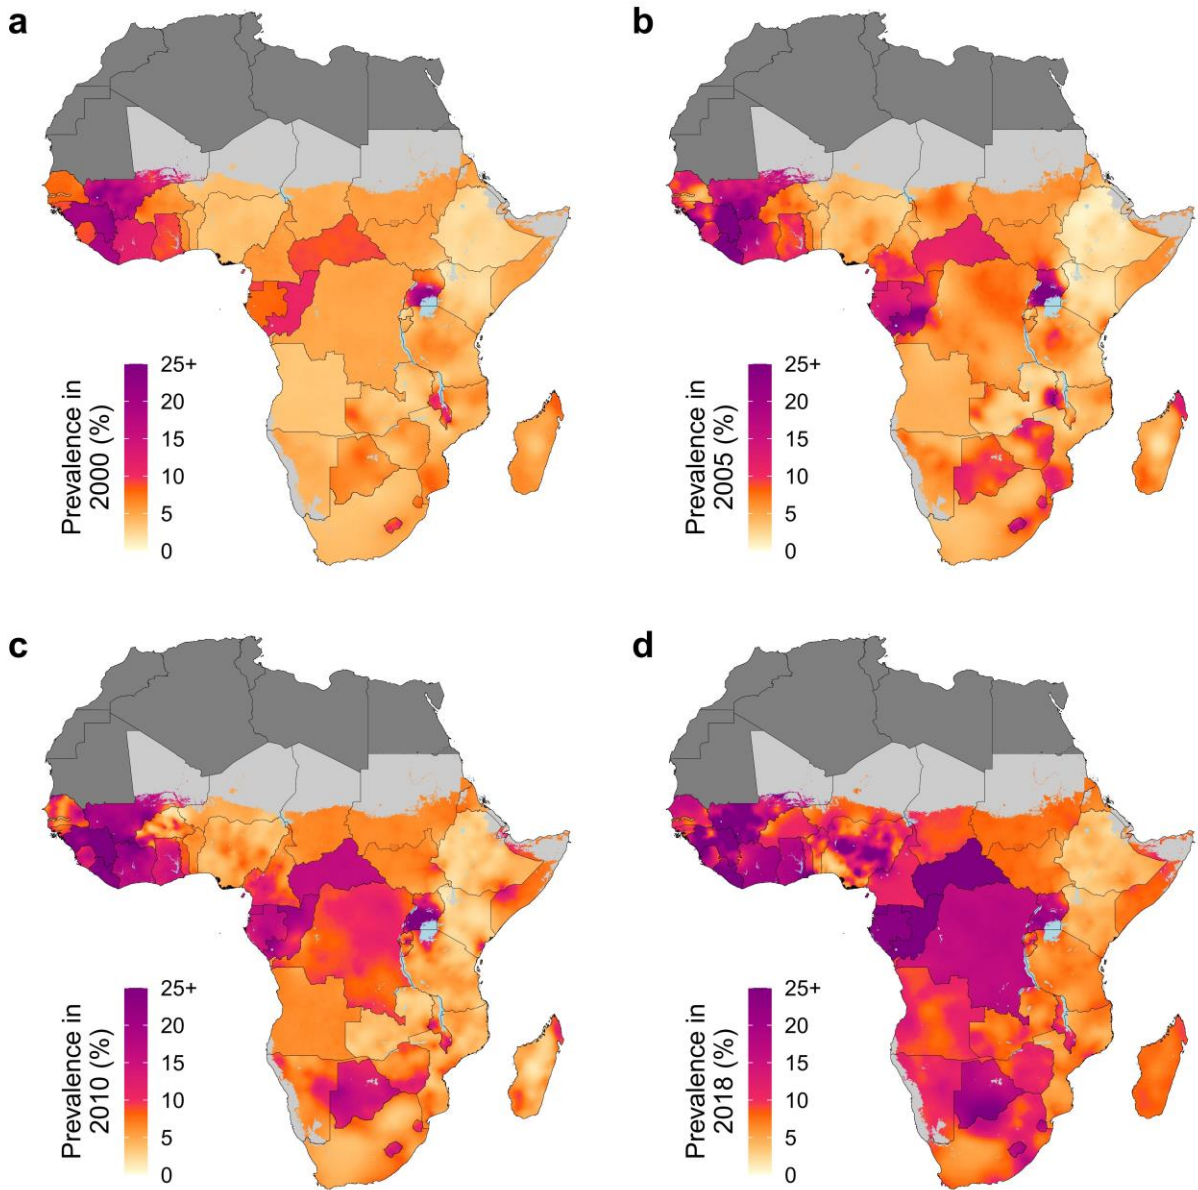

56  
57 **Figure S2: Prevalence of signs and symptoms of sexually transmitted**  
58 **STI symptoms (genital discharge and/or genital ulcer/sore) in the last 12 months among adults ages 15–**  
59 **49 years at the 5 x 5-km grid cell level in (a) 2000, (b) 2005, (c) 2010, and (d) 2018. Maps reflect**  
60 **administrative boundaries, land cover, lakes, and population; grid cells with fewer than ten people per 1 x**  
61 **1-km and classified as “barren or sparsely vegetated” are colored in light grey. Countries colored in dark**  
62 **grey were not included in the analysis.**

63 Figure S3: Prevalence of marriage or living as married

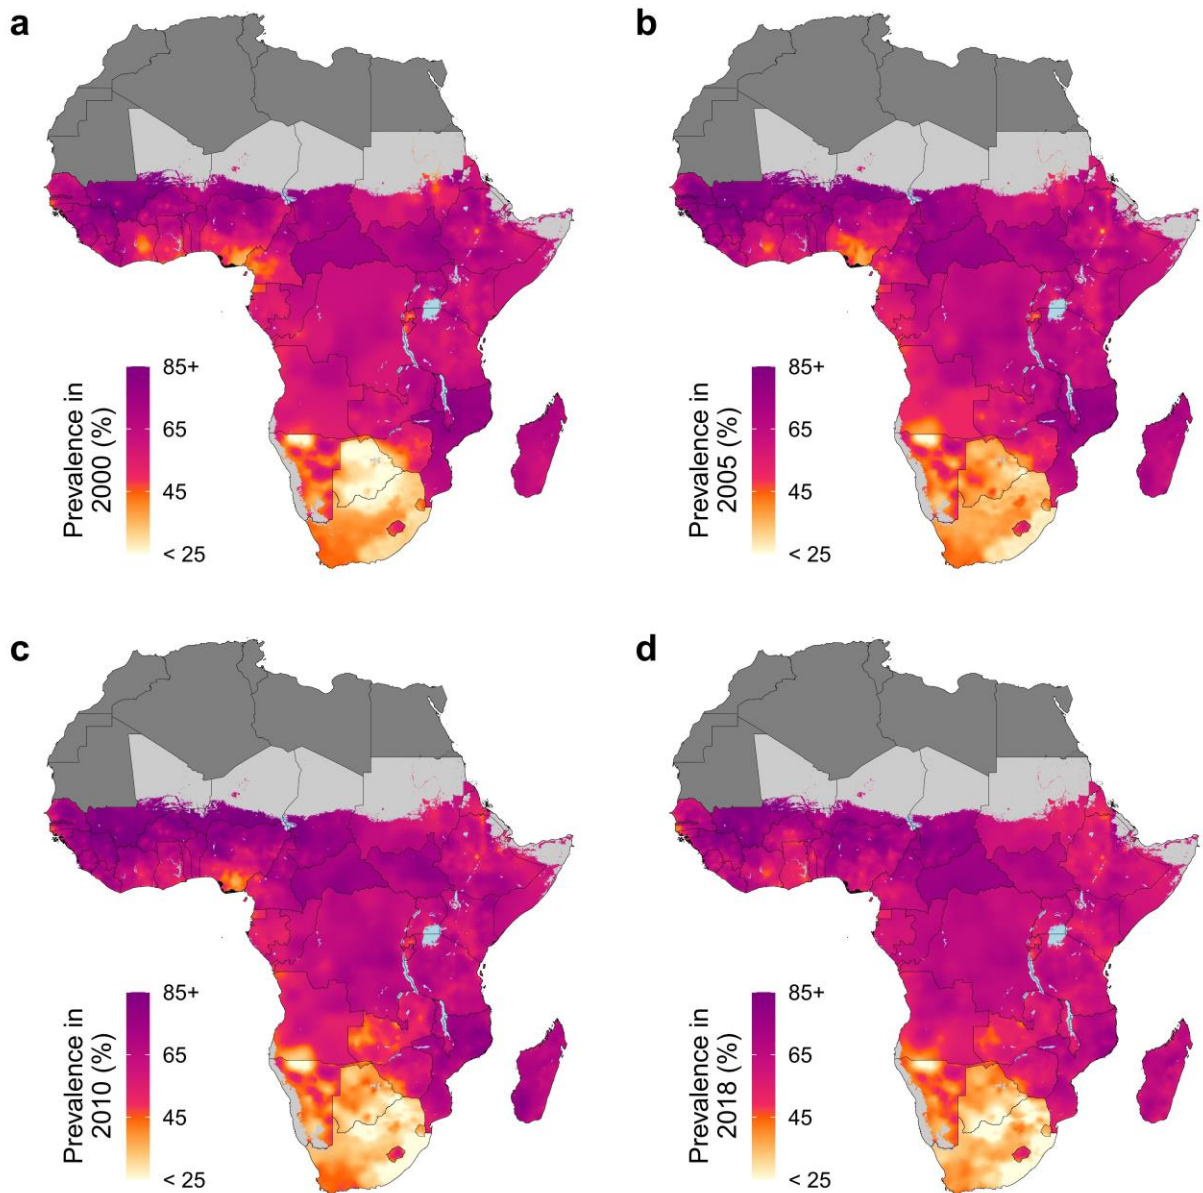

64

65 **Figure S3: Prevalence of marriage or living as married.** Prevalence of marriage or living as married among  
66 adults ages 15–49 years at the 5 x 5-km grid cell level in (a) 2000, (b) 2005, (c) 2010, and (d) 2018. Maps  
67 reflect administrative boundaries, land cover, lakes, and population; grid cells with fewer than ten people  
68 per 1 x 1-km and classified as “barren or sparsely vegetated” are colored in light grey. Countries colored  
69 in dark grey were not included in the analysis.



70 Figure S4: Prevalence of partner living elsewhere among females

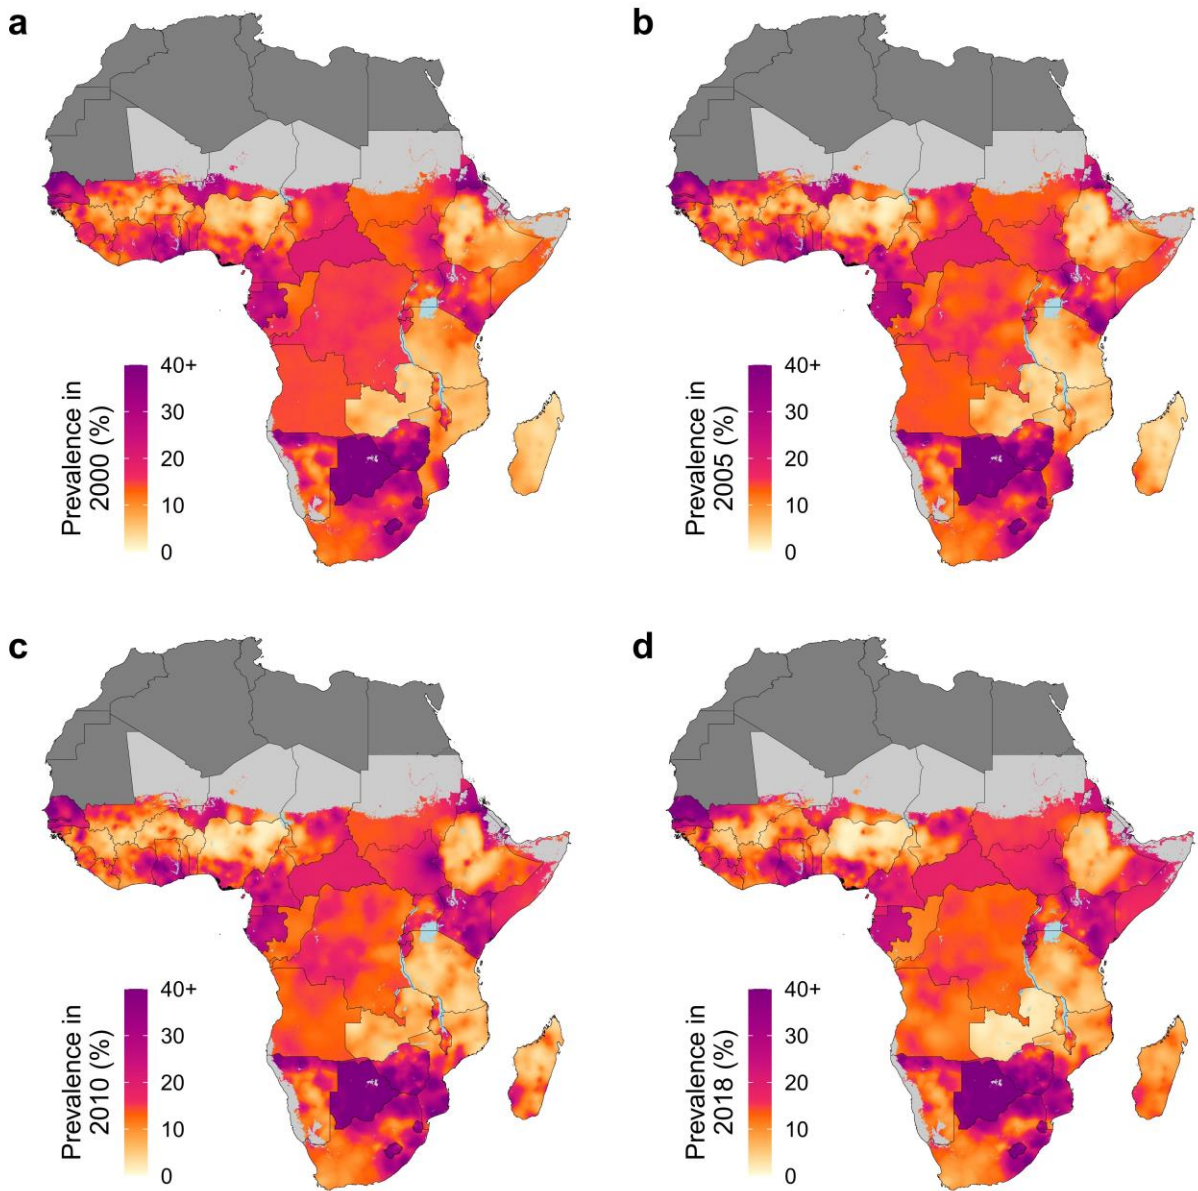

71

72 **Figure S4: Prevalence of partner living elsewhere among women.** Prevalence of partner living elsewhere  
73 among females ages 15–49 years at the 5 x 5-km grid cell level in (a) 2000, (b) 2005, (c) 2010, and (d)  
74 2018. Maps reflect administrative boundaries, land cover, lakes, and population; grid cells with fewer  
75 than ten people per 1 x 1-km and classified as “barren or sparsely vegetated” are colored in light grey.  
76 Countries colored in dark grey were not included in the analysis.

77 Figure S5: Prevalence of condom use during most recent sexual  
78 encounter

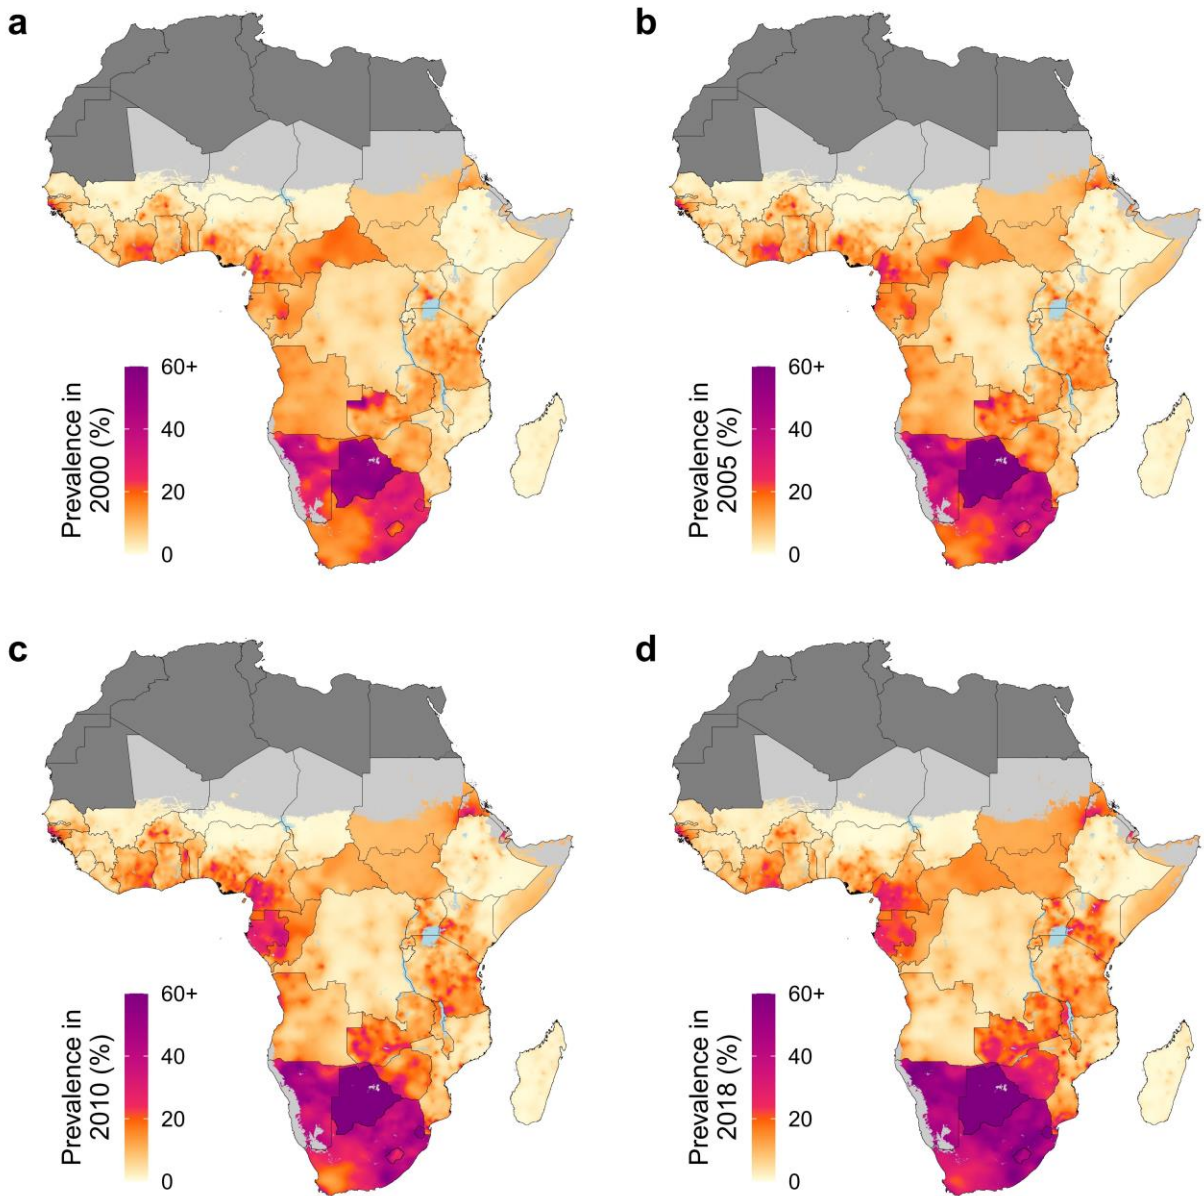

79

80 **Figure S5: Prevalence of condom use during most recent sexual encounter.** Prevalence of condom use  
81 during most recent sexual encounter within the last 12 months among adults ages 15–49 years at the 5 x  
82 5-km grid cell level in (a) 2000, (b) 2005, (c) 2010, and (d) 2018. Maps reflect administrative boundaries,  
83 land cover, lakes, and population; grid cells with fewer than ten people per 1 x 1-km and classified as  
84 “barren or sparsely vegetated” are colored in light grey. Countries colored in dark grey were not included  
85 in the analysis.

86  
87

Figure S6: Prevalence of sexual activity among young females

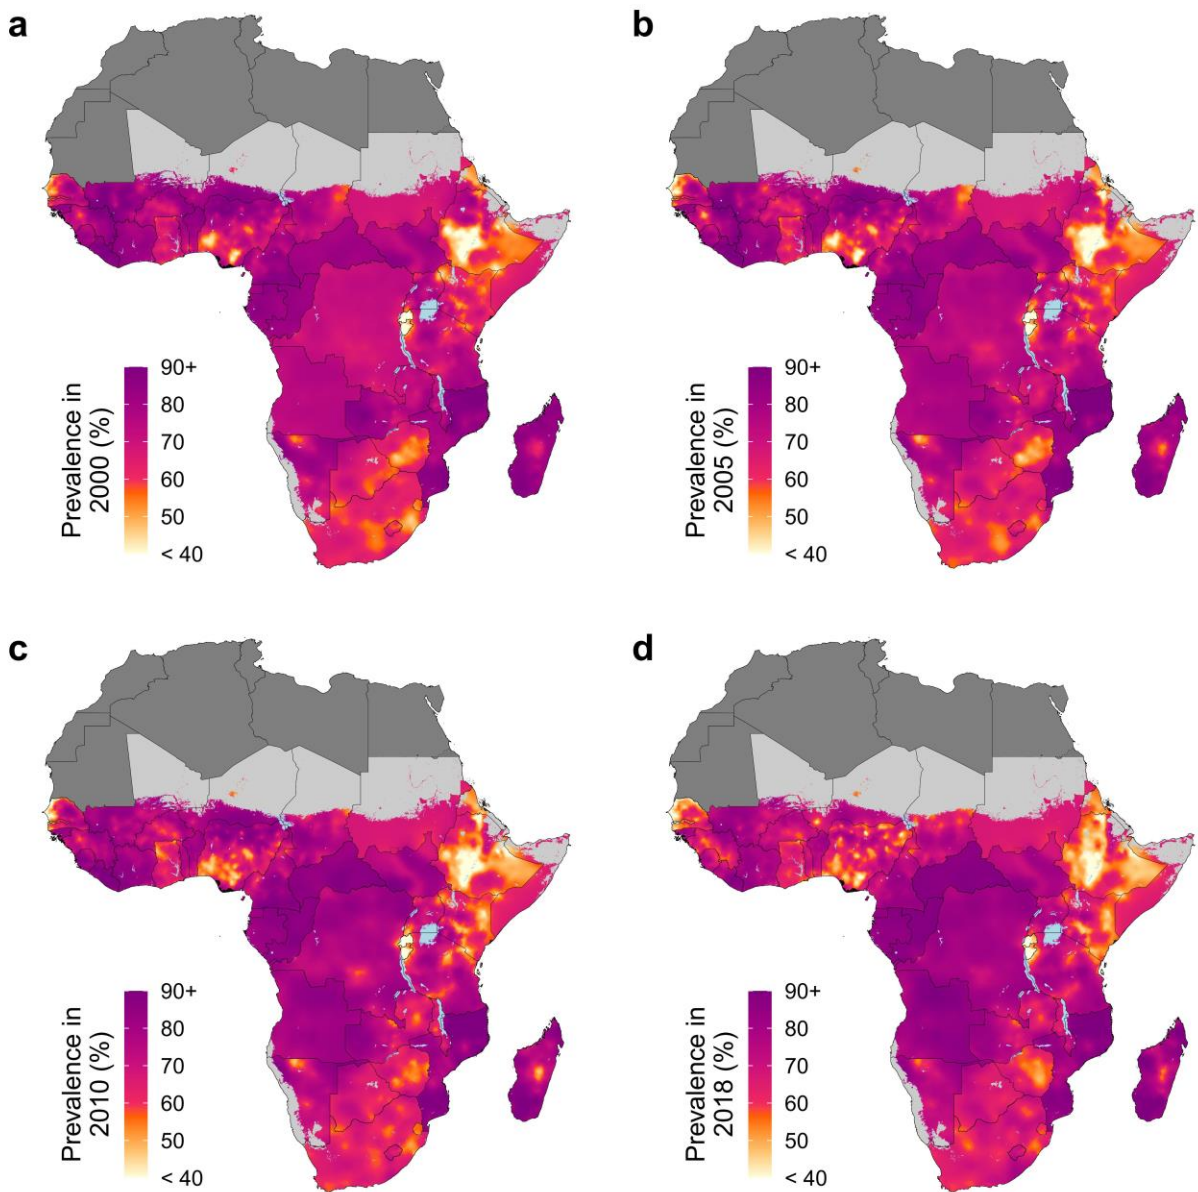

88

89 **Figure S6: Prevalence of sexual activity among young females.** Prevalence of sexual activity among females  
90 ages 15–24 years at the 5 x 5-km grid cell level in (a) 2000, (b) 2005, (c) 2010, and (d) 2018. Maps reflect  
91 administrative boundaries, land cover, lakes, and population; grid cells with fewer than ten people per 1 x  
92 1-km and classified as “barren or sparsely vegetated” are colored in light grey. Countries colored in dark  
93 grey were not included in the analysis.



94 Figure S7: Prevalence of multiple partners among males in the past year

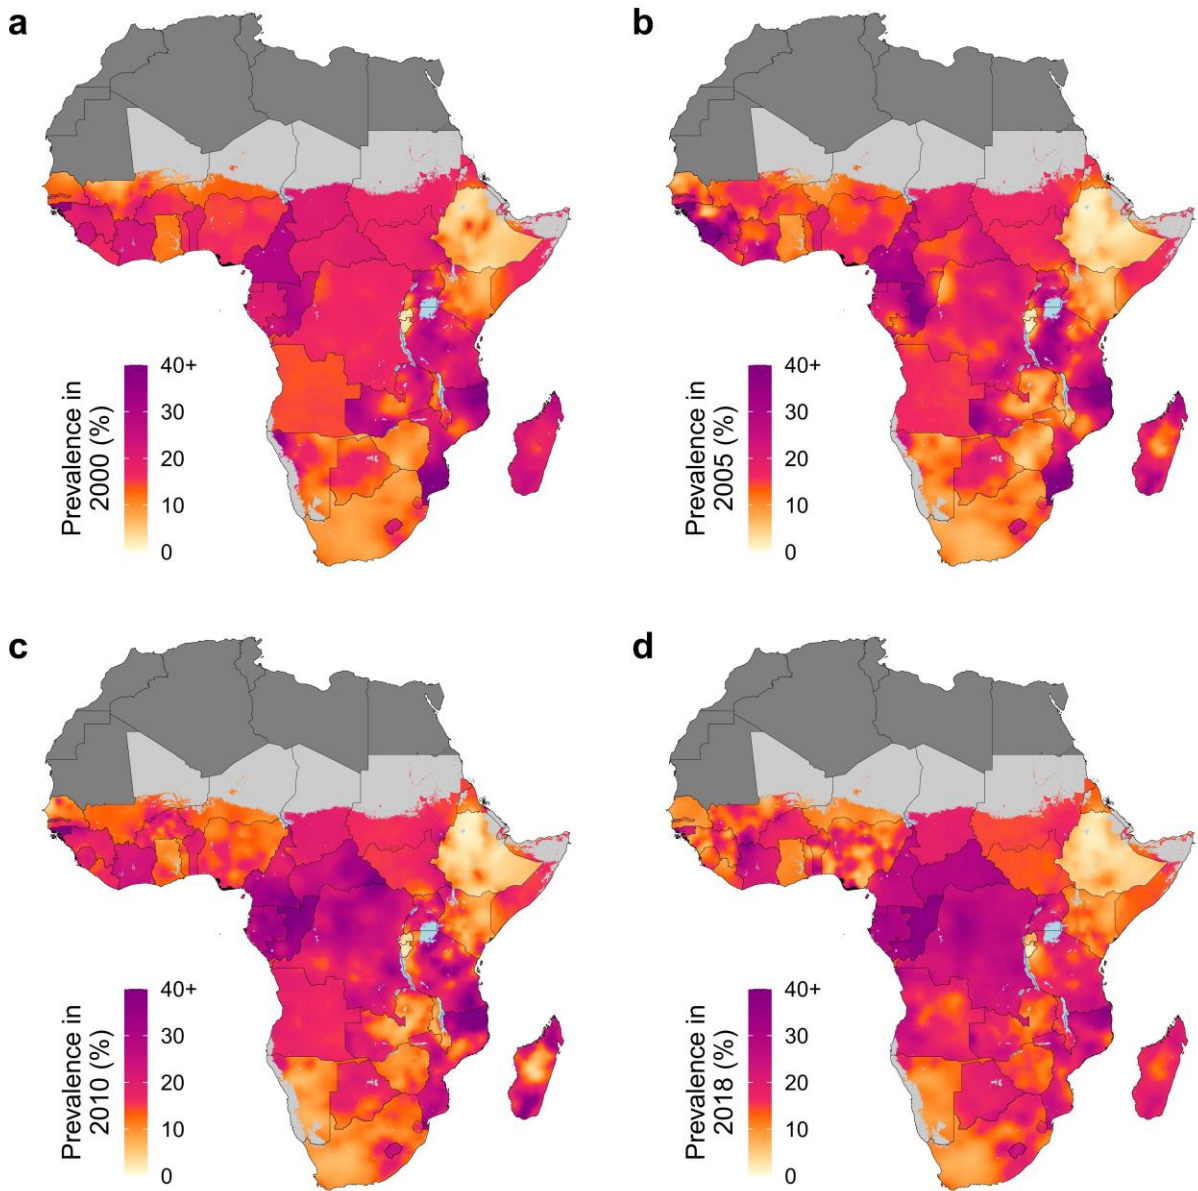

95  
96 **Figure S7: Prevalence of multiple partners among males in the past year.** Prevalence of multiple partners  
97 among males ages 15–49 years at the 5 x 5-km grid cell level in (a) 2000, (b) 2005, (c) 2010, and (d) 2018.  
98 Maps reflect administrative boundaries, land cover, lakes, and population; grid cells with fewer than ten  
99 people per 1 x 1-km and classified as “barren or sparsely vegetated” are colored in light grey. Countries  
100 colored in dark grey were not included in the analysis.

101 Figure S8: Prevalence of multiple partners among females in the past  
102 year

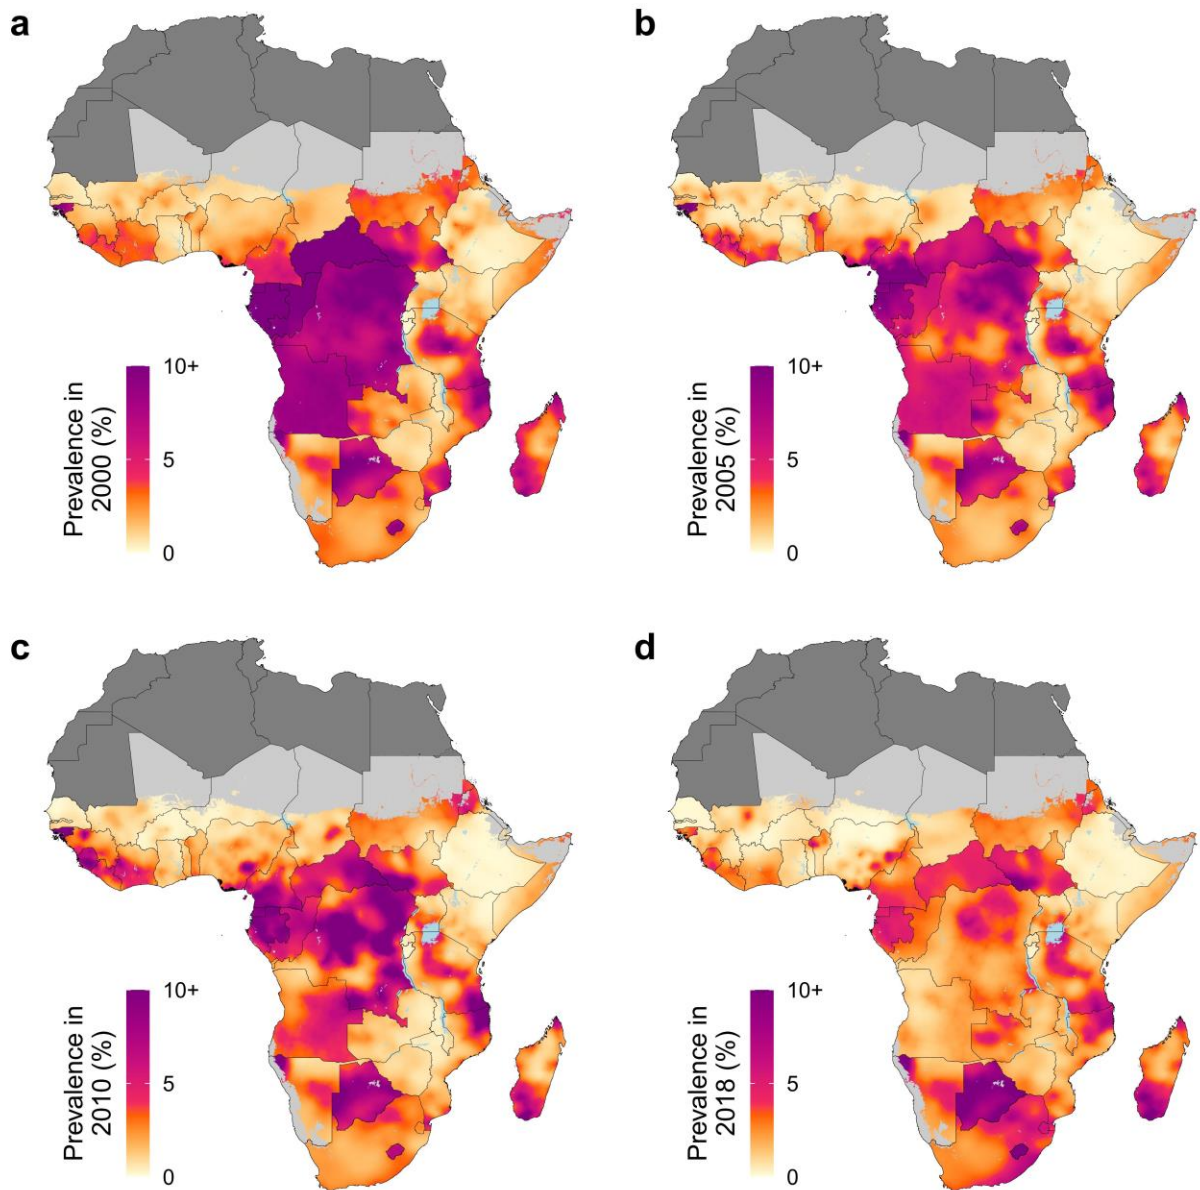

103  
104 **Figure S8: Prevalence of multiple partners among females in the past year.** Prevalence of multiple partners  
105 among females ages 15–49 years at the 5 x 5-km grid cell level in (a) 2000, (b) 2005, (c) 2010, and (d)  
106 2018. Maps reflect administrative boundaries, land cover, lakes, and population; grid cells with fewer  
107 than ten people per 1 x 1-km and classified as "barren or sparsely vegetated" are colored in light grey.  
108 Countries colored in dark grey were not included in the analysis.

109

110 Figure S9: HIV prevalence predictions from the boosted regression tree  
111 model  
112

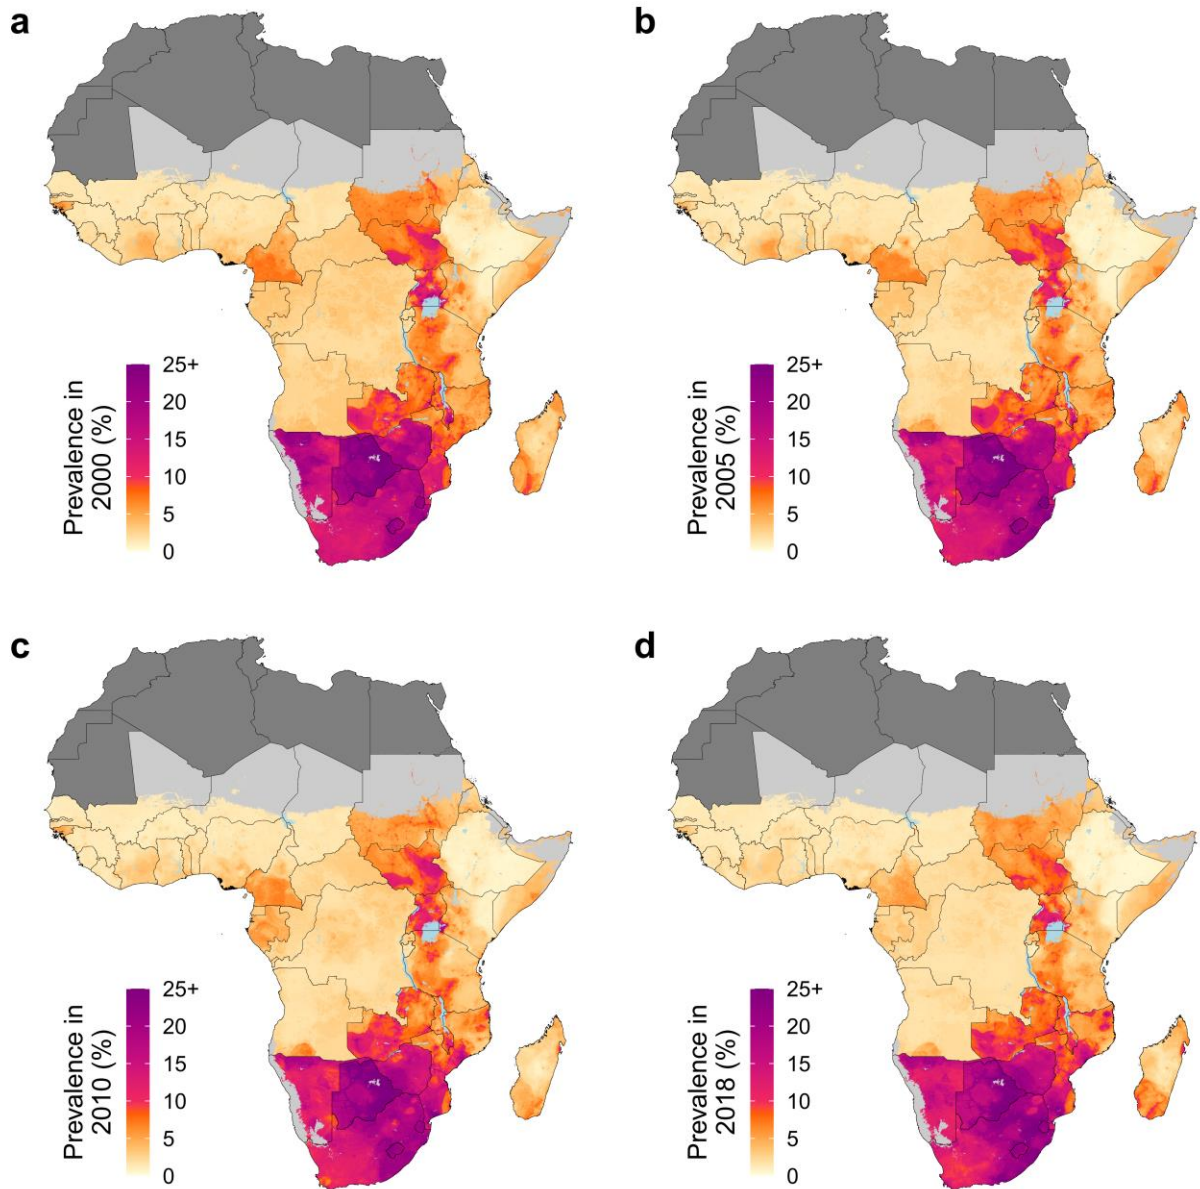

113  
114 **Figure S9: HIV prevalence predictions from the boosted regression tree model.** HIV prevalence among  
115 adults ages 15–49 years at the 5 x 5-km grid cell level in (a) 2000, (b) 2005, (c) 2010, and (d) 2018 as  
116 estimated in the boosted regression tree model. Maps reflect administrative boundaries, land cover,  
117 lakes, and population; grid cells with fewer than ten people per 1 x 1-km and classified as “barren or  
118 sparsely vegetated” are colored in light grey. Countries colored in dark grey were not included in the  
119 analysis.



120 Figure S10: HIV prevalence predictions from the generalized additive  
121 model  
122

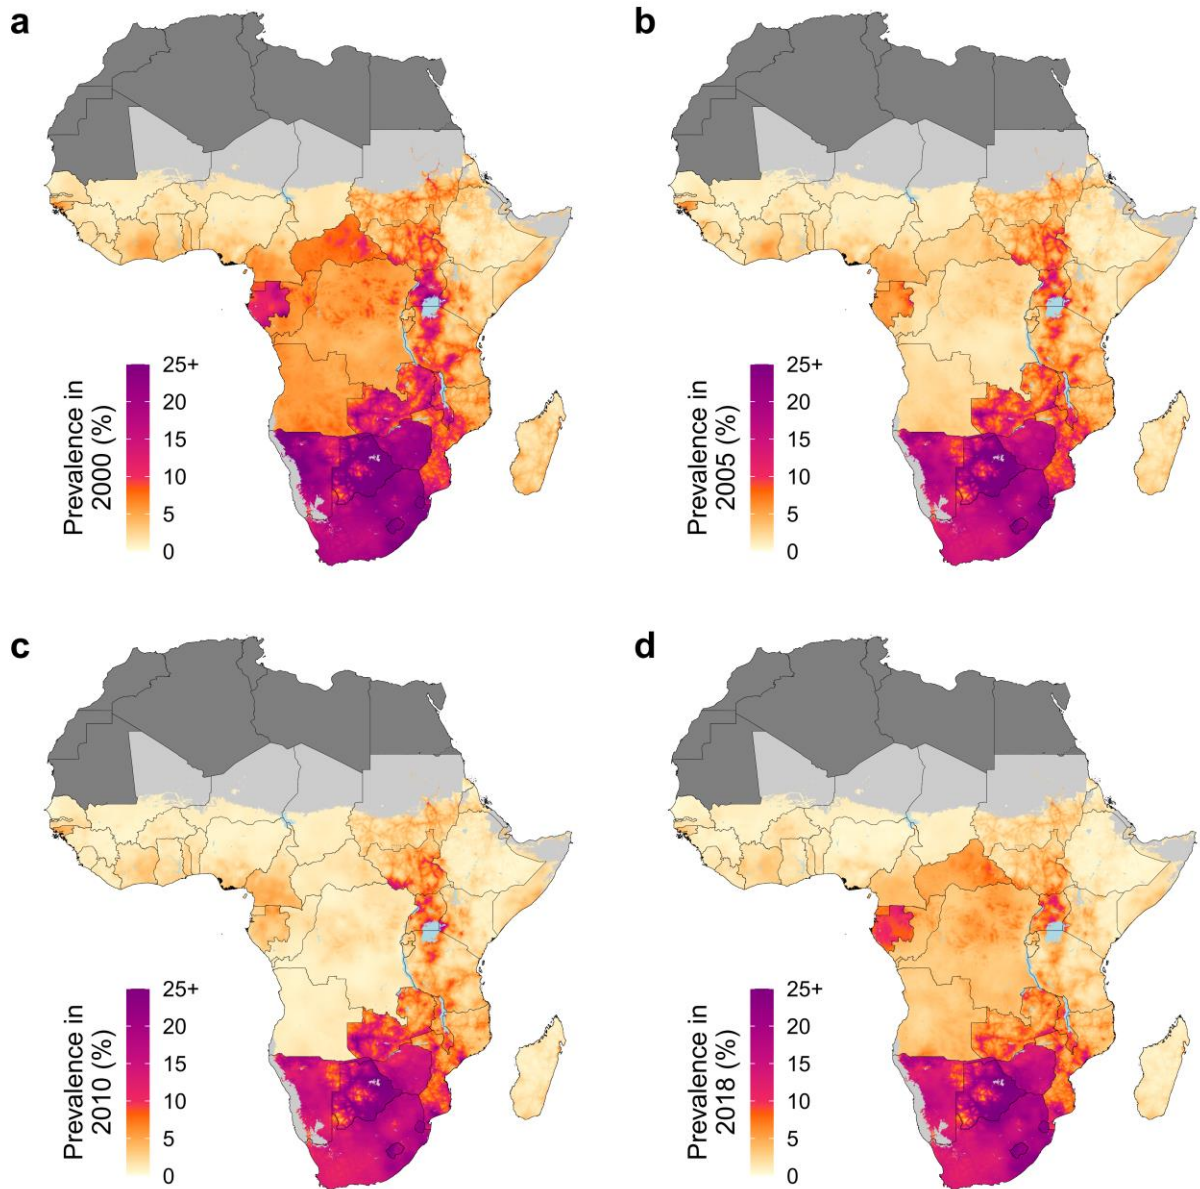

123  
124 **Figure S10: HIV prevalence predictions from the generalized additive model.** HIV prevalence among adults  
125 ages 15–49 years at the 5 x 5-km grid cell level in (a) 2000, (b) 2005, (c) 2010, and (d) 2018 as estimated  
126 in the generalized additive model. Maps reflect administrative boundaries, land cover, lakes, and  
127 population; grid cells with fewer than ten people per 1 x 1-km and classified as “barren or sparsely  
128 vegetated” are colored in light grey. Countries colored in dark grey were not included in the analysis.



129 Figure S11: HIV prevalence predictions from the lasso regression model  
130

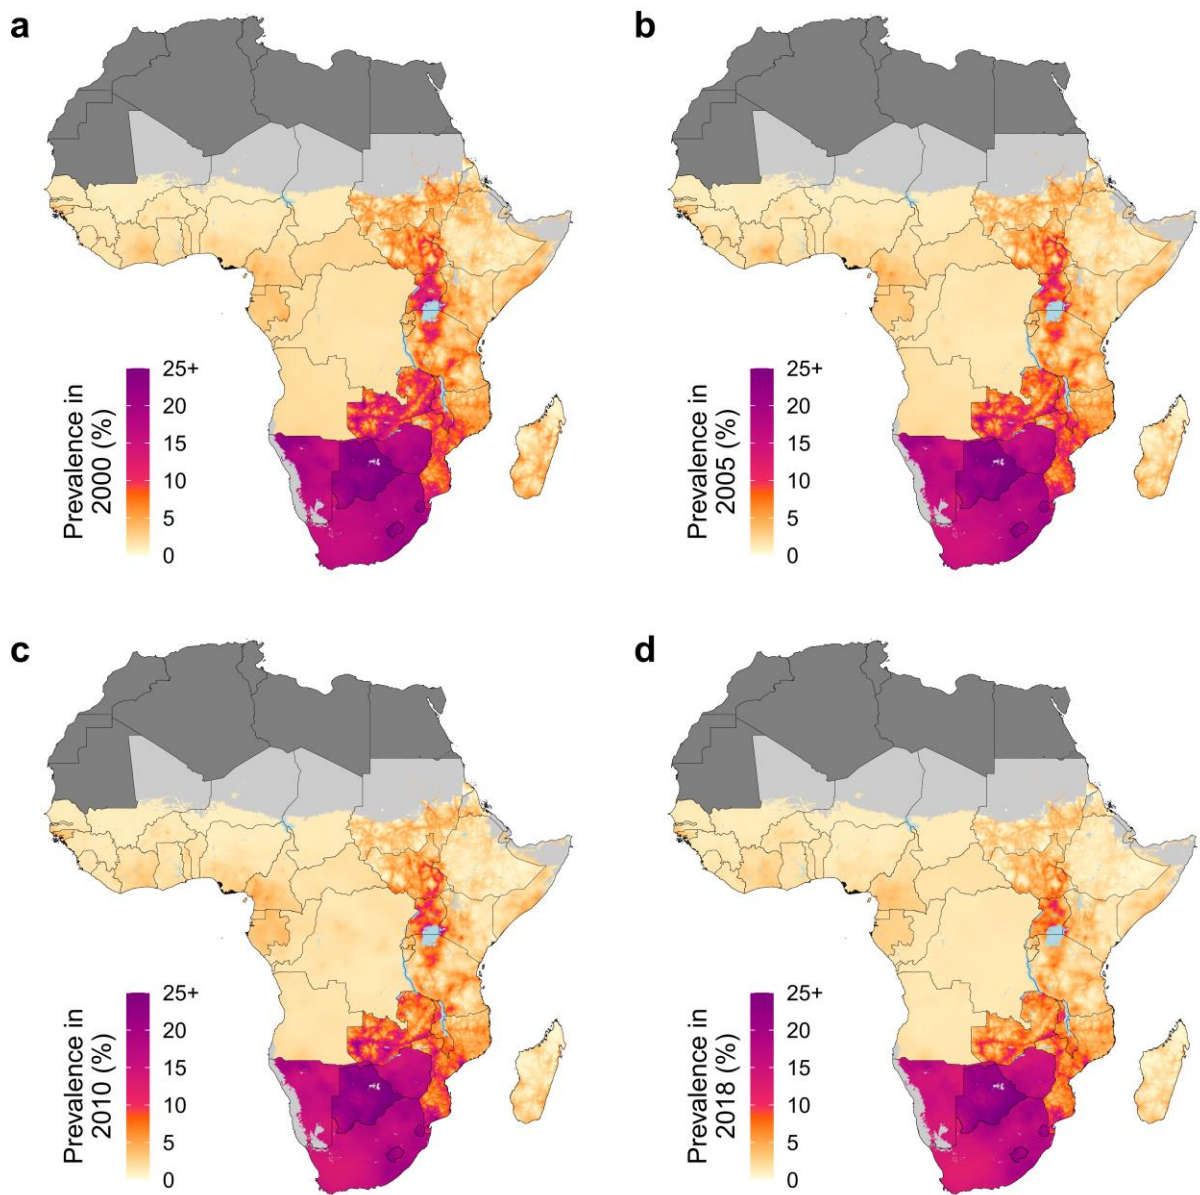

131  
132 **Figure S11: HIV prevalence predictions from the lasso regression model.** HIV prevalence among adults ages  
133 15–49 years at the 5 x 5-km grid cell level in (a) 2000, (b) 2005, (c) 2010, and (d) 2018 as estimated in the  
134 lasso regression model. Maps reflect administrative boundaries, land cover, lakes, and population; grid  
135 cells with fewer than ten people per 1 x 1-km and classified as “barren or sparsely vegetated” are colored  
136 in light grey. Countries colored in dark grey were not included in the analysis.

137 Figure S12: Modeling regions

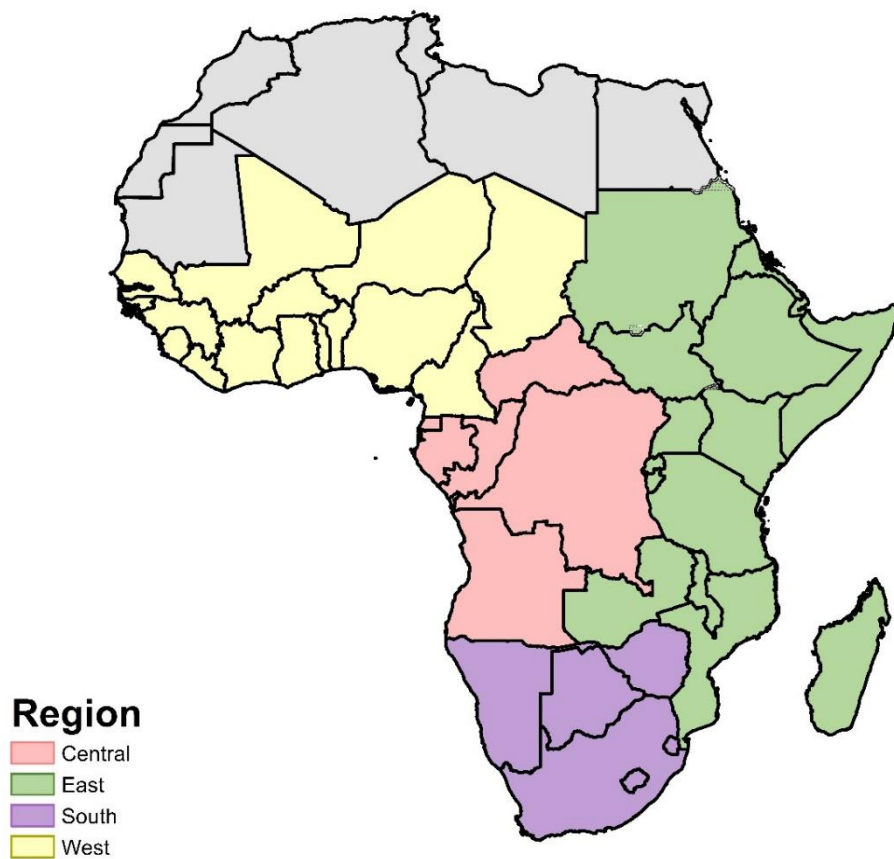

138

139

140 **Figure S12: Modeling regions.** Modeling regions were based on the four Global Burden of Disease Study  
141 (GBD) regions in sub-Saharan Africa: Central, East, South, and West. We removed Cape Verde, Comoros,  
142 São Tomé and Príncipe, and Mauritania from our analysis due to data missingness. Countries coloured in  
143 grey were not included in the analysis.

144  
145

Figure S13: Age- and sex-specific vs. adult prevalence modeling

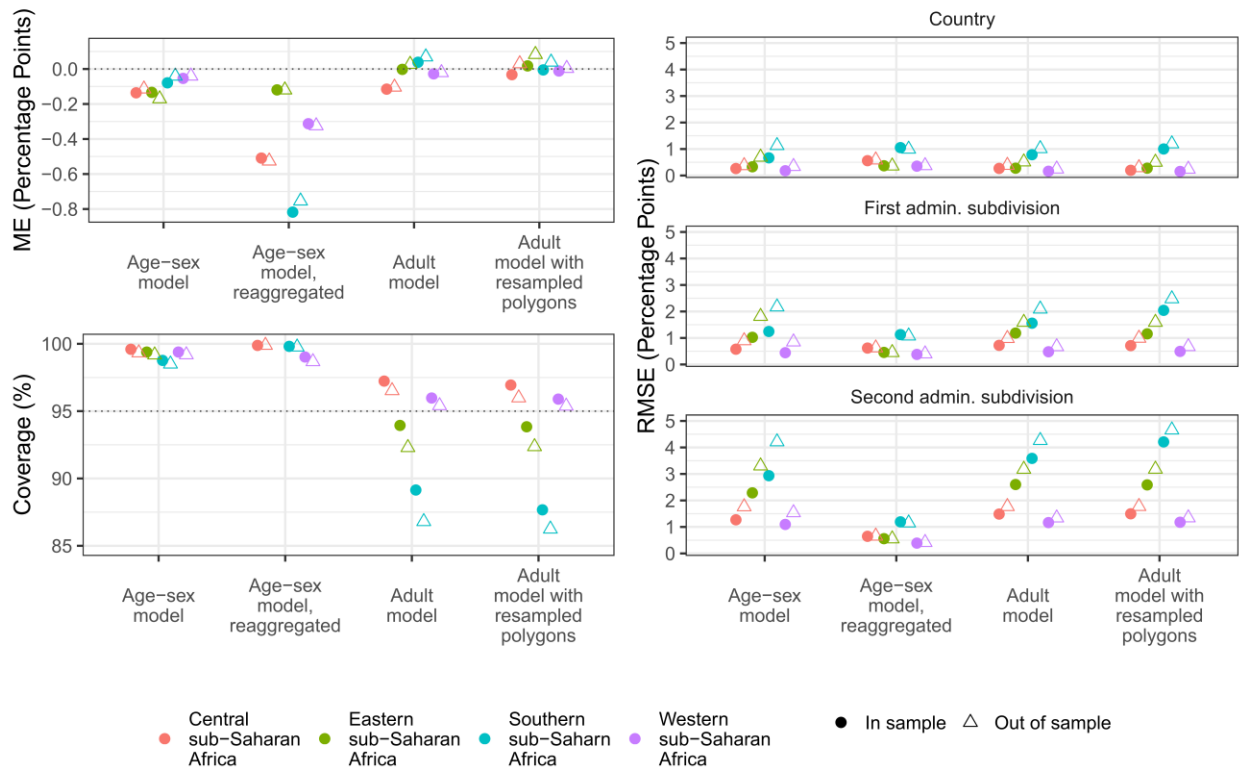

146

147

148 **Figure S13: Age- and sex-specific vs. adult prevalence modeling.** Mean error (ME; top left), 95%  
 149 prediction interval coverage ('coverage'; bottom left), and root-mean-square error by administrative level  
 150 of aggregation (RMSE; right) for comparing the results of the final age- and sex-specific model, the results  
 151 of the same model re-aggregated to the adult level, the results of HIV prevalence modeled at the adult  
 152 level, and the results of HIV prevalence modeled at the adult level, using polygon resampling techniques.  
 153 Results are presented by modeling region (indicated by color) and for in- and out-of-sample results  
 154 (indicated by shape). Note that for the Central sub-Saharan Africa "Adult model", out-of-sample  
 155 estimates were based on the results of four folds rather than five, due to non-convergence in one out-of-  
 156 sample model.

157 Figure S14: Data sensitivity

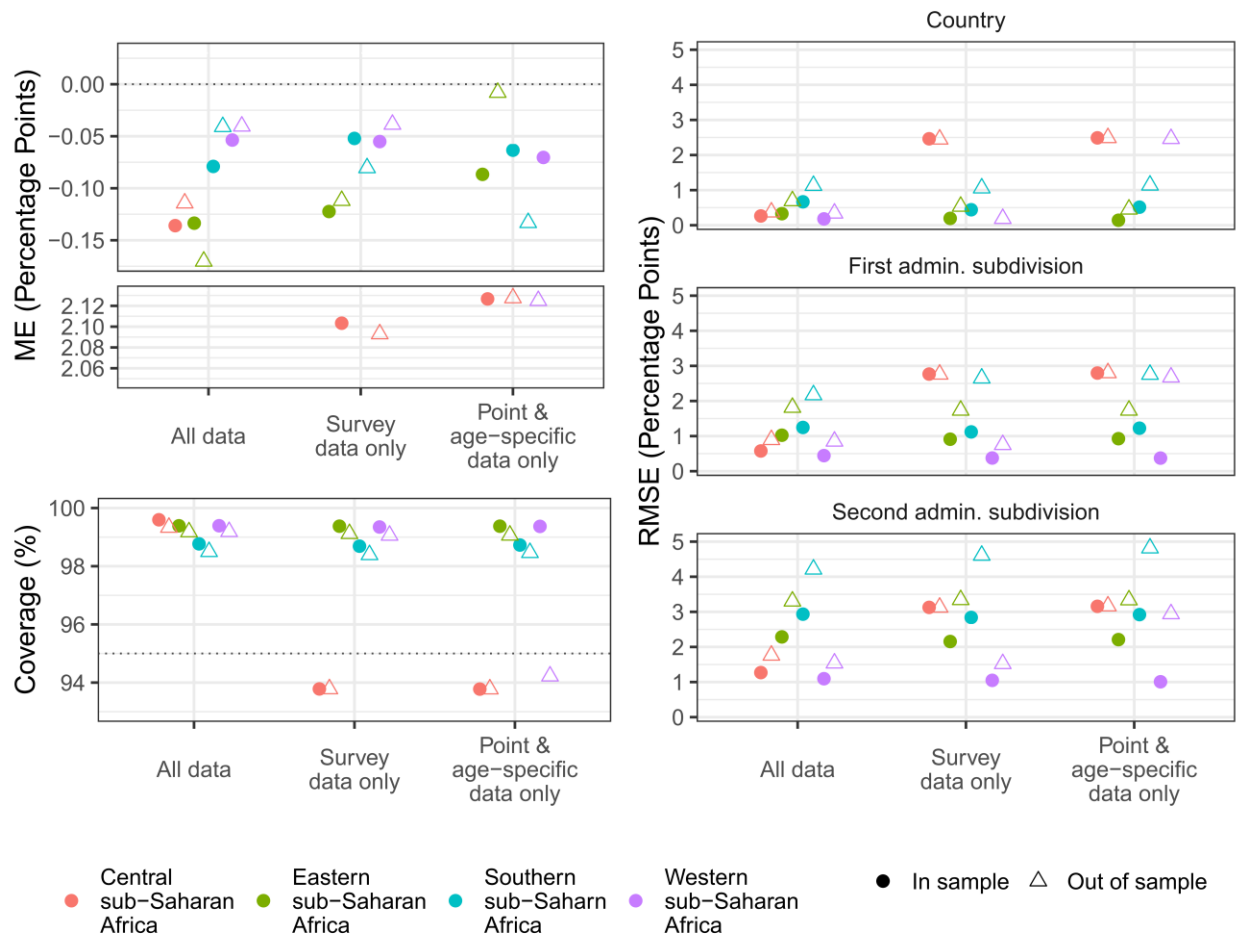

158

159 **Figure S14: Data sensitivity.** Mean error (ME; top left), 95% prediction interval coverage ('coverage';  
 160 bottom left), and root-mean-square error by administrative level of aggregation (RMSE; right) for  
 161 comparing the results of the final model with all data included, with only location- and age-specific data  
 162 included, and with only survey data included. Results are presented by modeling region (indicated by  
 163 color) and for in- and out-of-sample results (indicated by shape).



## Figure S15: Model specification validation

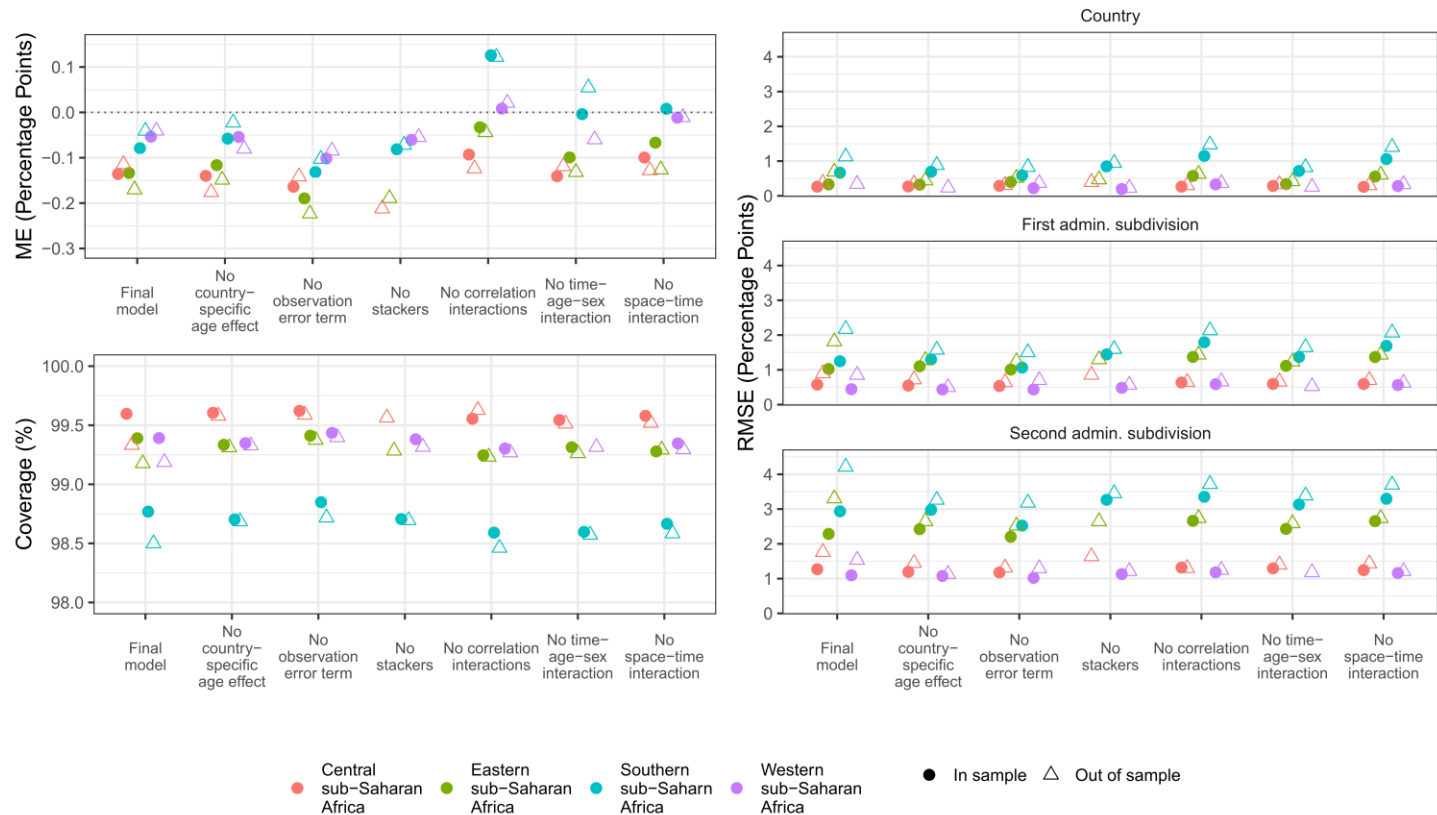

166

167

168

169

170

171

172

**Figure S15: Model specification validation.** Mean error (ME; top left), 95% prediction interval coverage ('coverage'; bottom left), and root-mean-square error by administrative level of aggregation (RMSE; right) comparing the results of the final model configuration with that of models with individual terms missing. Results are presented by modeling region (indicated by color) and for in- and out-of-sample results (indicated by shape). Note that for the Central sub-Saharan Africa "No stackers" model, no in-sample results are presented, and out-of-sample estimates were based on the results of three folds rather than five, due to non-convergence in the in-sample model and two out-of-sample models. Eastern sub-Saharan Africa also experienced non-convergence in one out-of-sample "No stackers" model, as well as in the in-sample "No observation error term" model.

173 Figure S16: Modeled and re-aggregated adult prevalence comparison

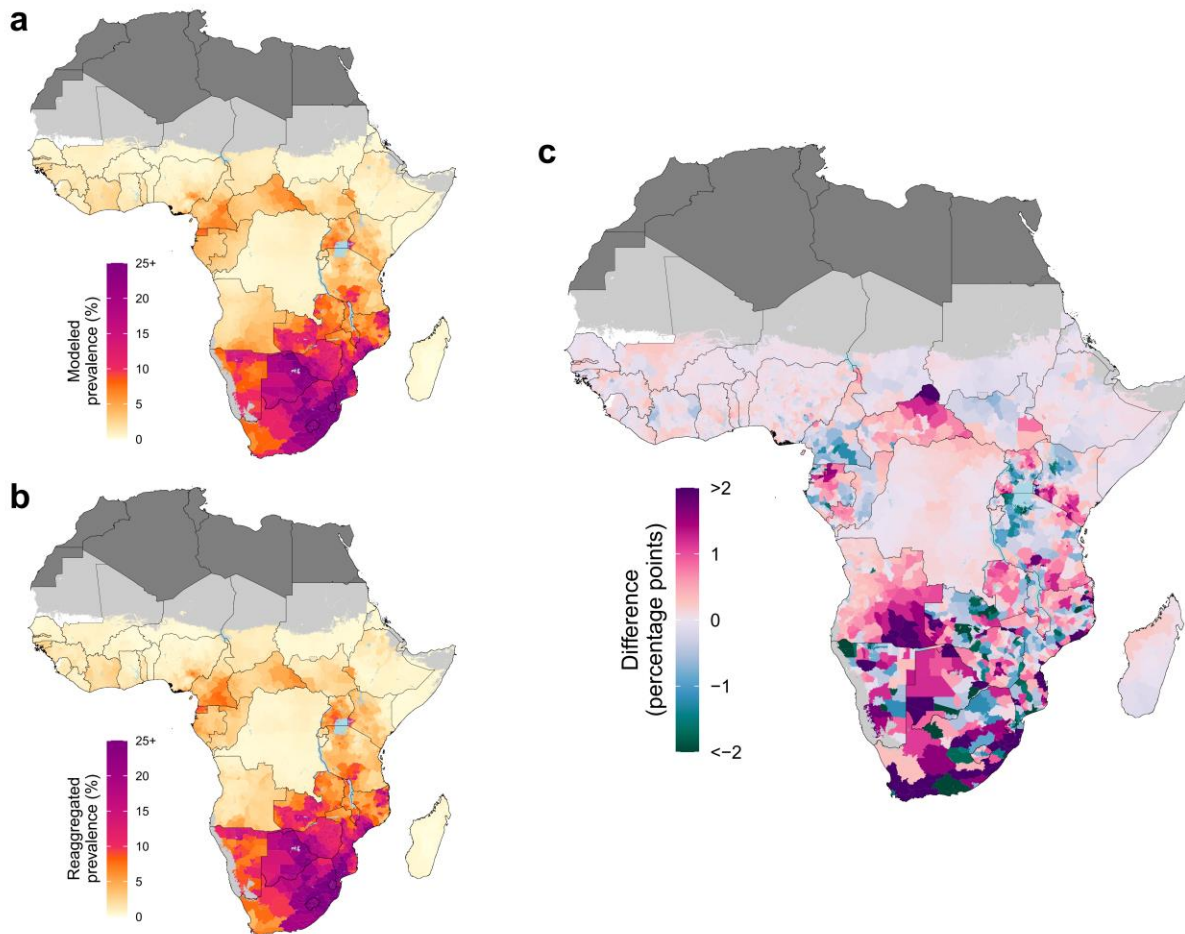

174

175 **Figure S16: Modeled and re-aggregated adult prevalence comparison.** A comparison of HIV prevalence  
176 estimates at the second administrative level in 2018 for adults 15–49 years when modeled **(a)** at the adult  
177 level versus **(b)** modeled at the age- and sex-specific level, and subsequently re-aggregated for adults 15–  
178 49 years. **(c)** The difference between modeled prevalence and re-aggregated prevalence. Both modeled  
179 and re-aggregated prevalence estimates were calibrated to GBD 2019 estimates[1]. Maps reflect  
180 administrative boundaries, land cover, lakes, and population; grid cells with fewer than ten people per 1 x  
181 1-km and classified as “barren or sparsely vegetated” are colored in light grey. Countries colored in dark  
182 grey were not included in the analysis.

183 1. GBD 2019 Diseases and Injuries Collaborators. Global burden of 369 diseases and injuries in 204  
184 countries and territories, 1990–2019: a systematic analysis for the Global Burden of Disease Study 2019.  
185 Lancet. 2020; 396:1204–22.

186

187 Figure S17: HIV prevalence raking factors for males

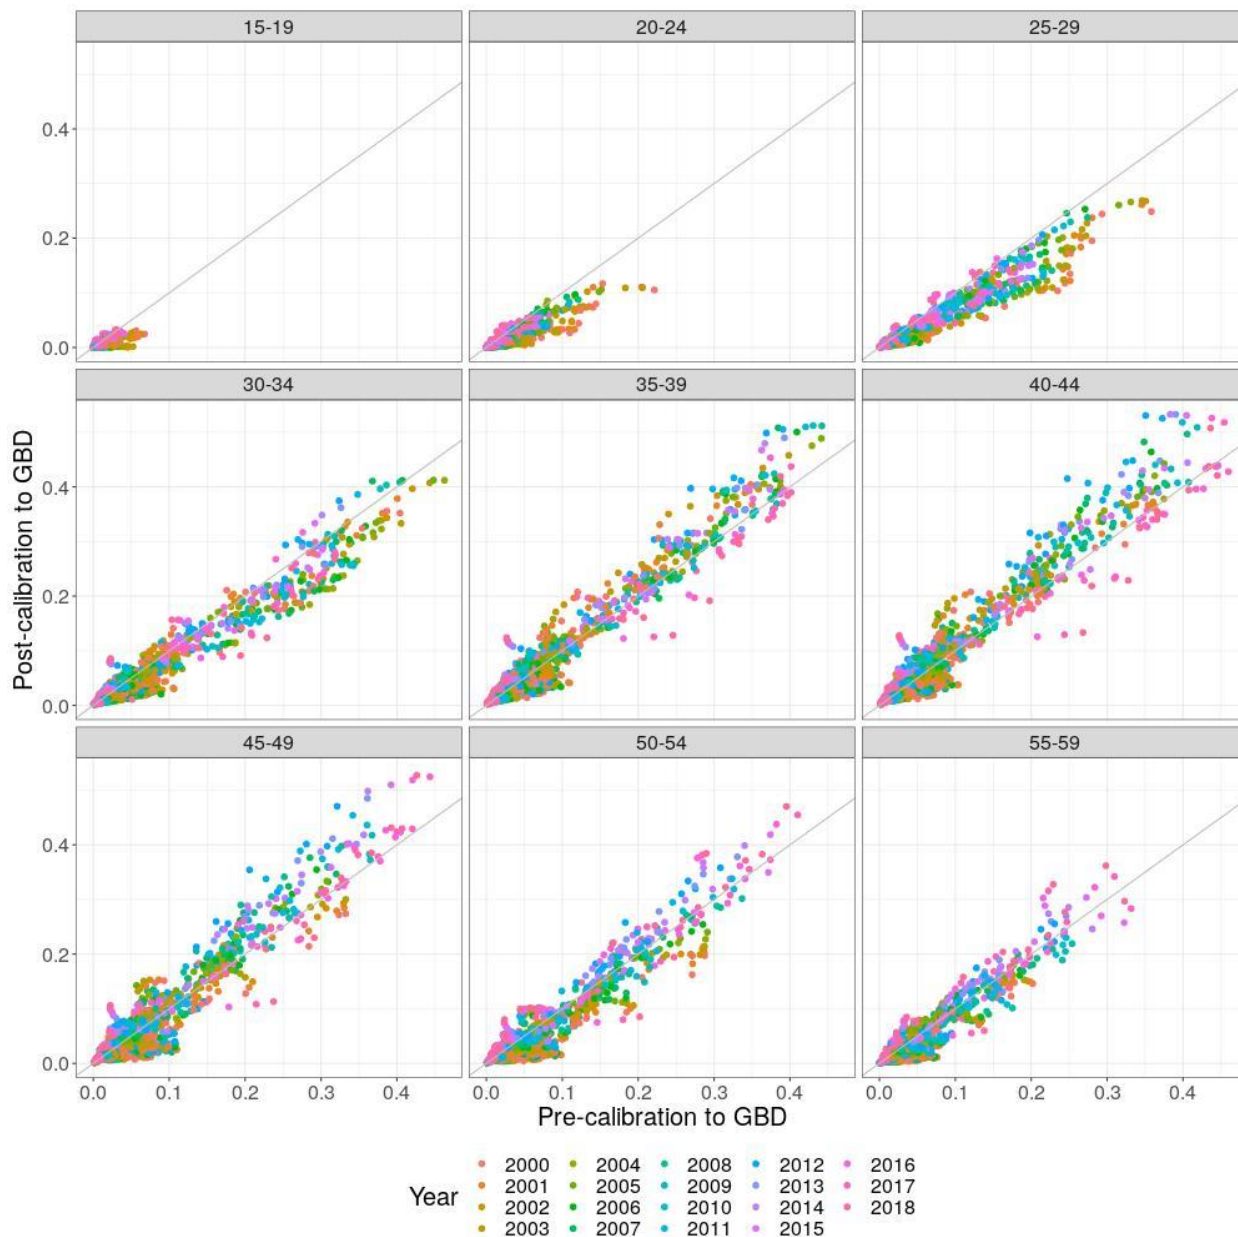

188

189 **Figure S17: HIV prevalence raking factors for males.** Comparison of country-level, age-specific HIV  
190 prevalence estimates for males, derived by population-weighting 5 x 5-km grid cell estimates before (x-  
191 axis) and after (y-axis) calibration to GBD 2019 by age group (panel), year (color) and country (individual  
192 point).

193 Figure S18: HIV prevalence raking factors for females

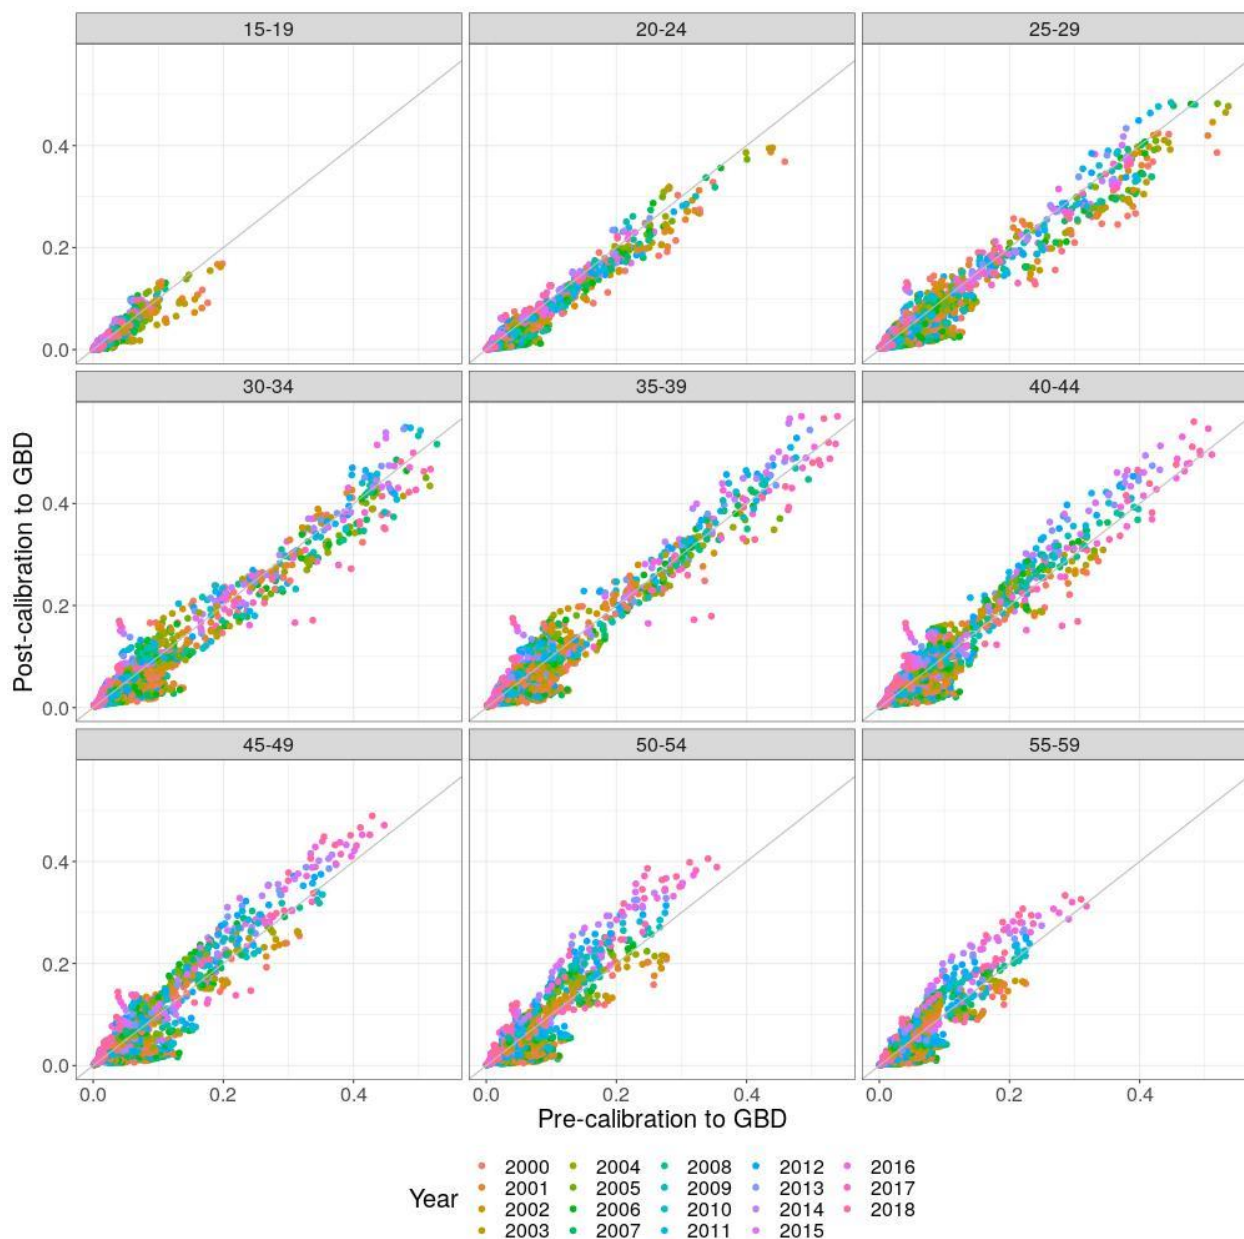

194  
195

196 **Figure S18: HIV prevalence raking factors for females.** Comparison of country-level, age-specific HIV  
197 prevalence estimates for females derived by population-weighting 5 x 5-km grid cell estimates before (x-  
198 axis) and after (y-axis) calibration to GBD 2019 by age group (panel), year (color) and country (individual  
199 point).



200 Figure S19: Age-specific HIV prevalence in males, 2000

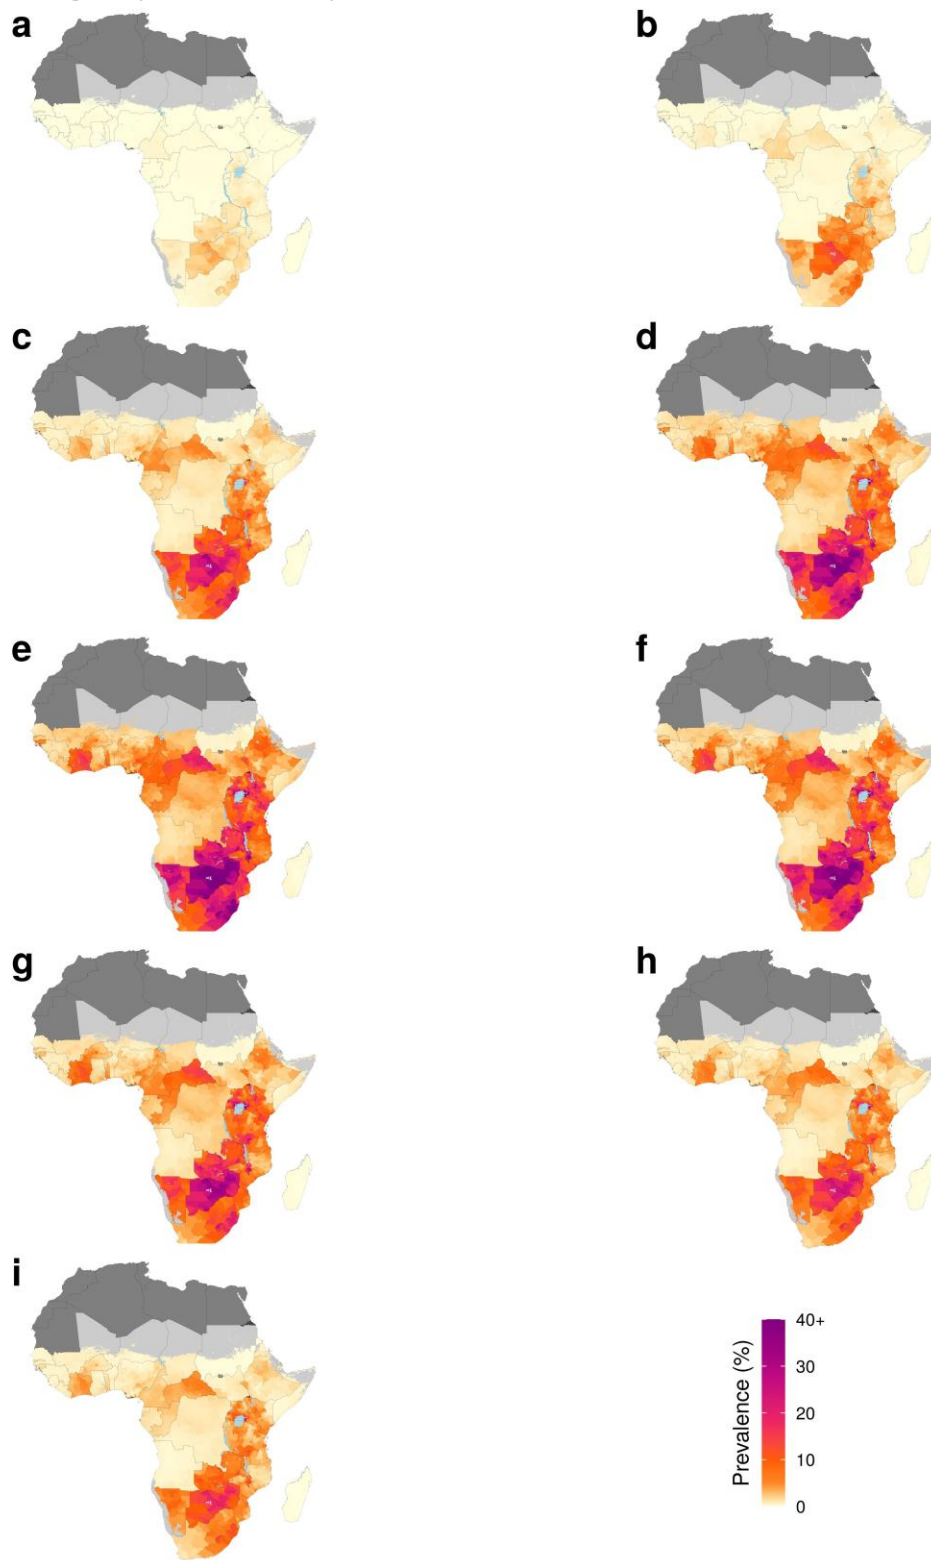

201

202 Figure S19: Age-specific HIV prevalence in males, 2000. Male HIV prevalence estimates in the year 2000, at  
203 the second administrative level, for (a) ages 15–19 years; (b) ages 20-24 years; (c) ages 25-29 years; (d)

204 ages 30-34 years; (e) ages 35-39 years; (f) ages 40-44 years; (g) ages 45-49 years; (h) ages 50-54 years;  
205 and (i) ages 55-59 years. Maps reflect national boundaries, land cover, lakes, and population; areas with  
206 fewer than ten people per 1 × 1 km, and classified as barren or sparsely vegetated, are colored light grey.  
207 Countries colored in dark grey were not included in the analysis.

208 Figure S20: Age-specific HIV prevalence in females, 2000

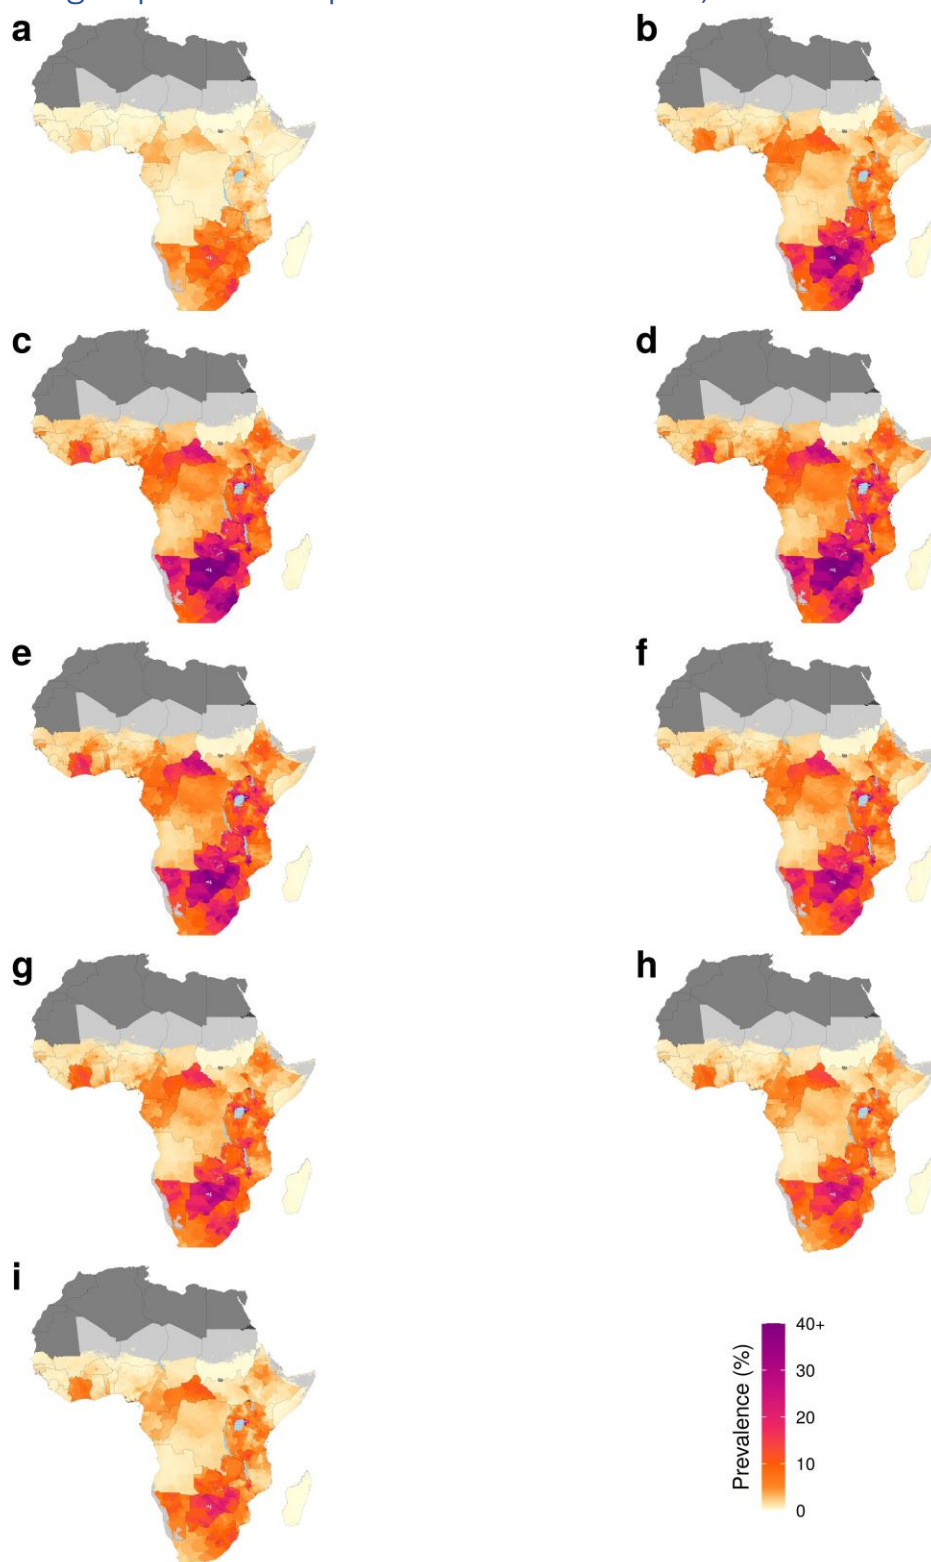

209

210 Figure S20: Age-specific HIV prevalence in females, 2000. Female HIV prevalence estimates in the year  
211 2000, at the second administrative level, for (a) ages 15–19 years; (b) ages 20–24 years; (c) ages 25–29

212 years; (d) ages 30-34 years; (e) ages 35-39 years; (f) ages 40-44 years; (g) ages 45-49 years; (h) ages 50-54  
213 years; and (i) ages 55-59 years. Maps reflect national boundaries, land cover, lakes, and population; areas  
214 with fewer than ten people per 1 × 1 km, and classified as barren or sparsely vegetated, are colored light  
215 grey. Countries colored in dark grey were not included in the analysis.

216

217 Figure S21: Age-specific HIV prevalence in males, 2005  
218

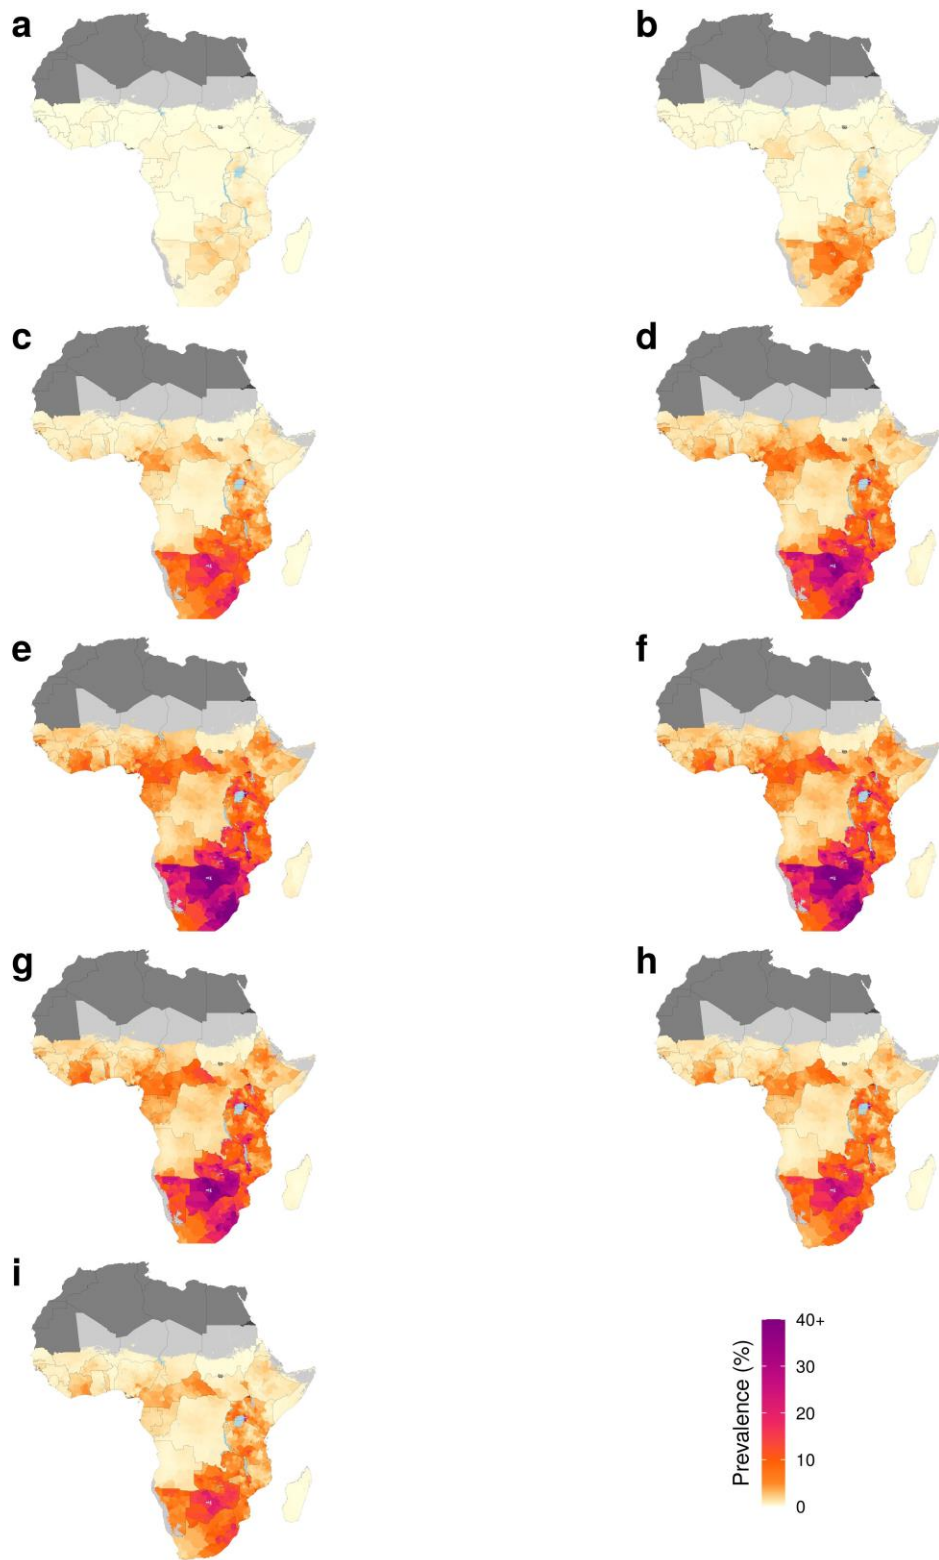

219



220 **Figure S21: Age-specific HIV prevalence in males, 2005.** Male HIV prevalence estimates in the year 2005, at  
221 the second administrative level, for (a) ages 15–19 years; (b) ages 20-24 years; (c) ages 25-29 years; (d)  
222 ages 30-34 years; (e) ages 35-39 years; (f) ages 40-44 years; (g) ages 45-49 years; (h) ages 50-54 years;  
223 and (i) ages 55-59 years. Maps reflect national boundaries, land cover, lakes, and population; areas with  
224 fewer than ten people per 1 × 1 km, and classified as barren or sparsely vegetated, are colored light grey.  
225 Countries colored in dark grey were not included in the analysis.

226 Figure S22: Age-specific HIV prevalence in females, 2005

227

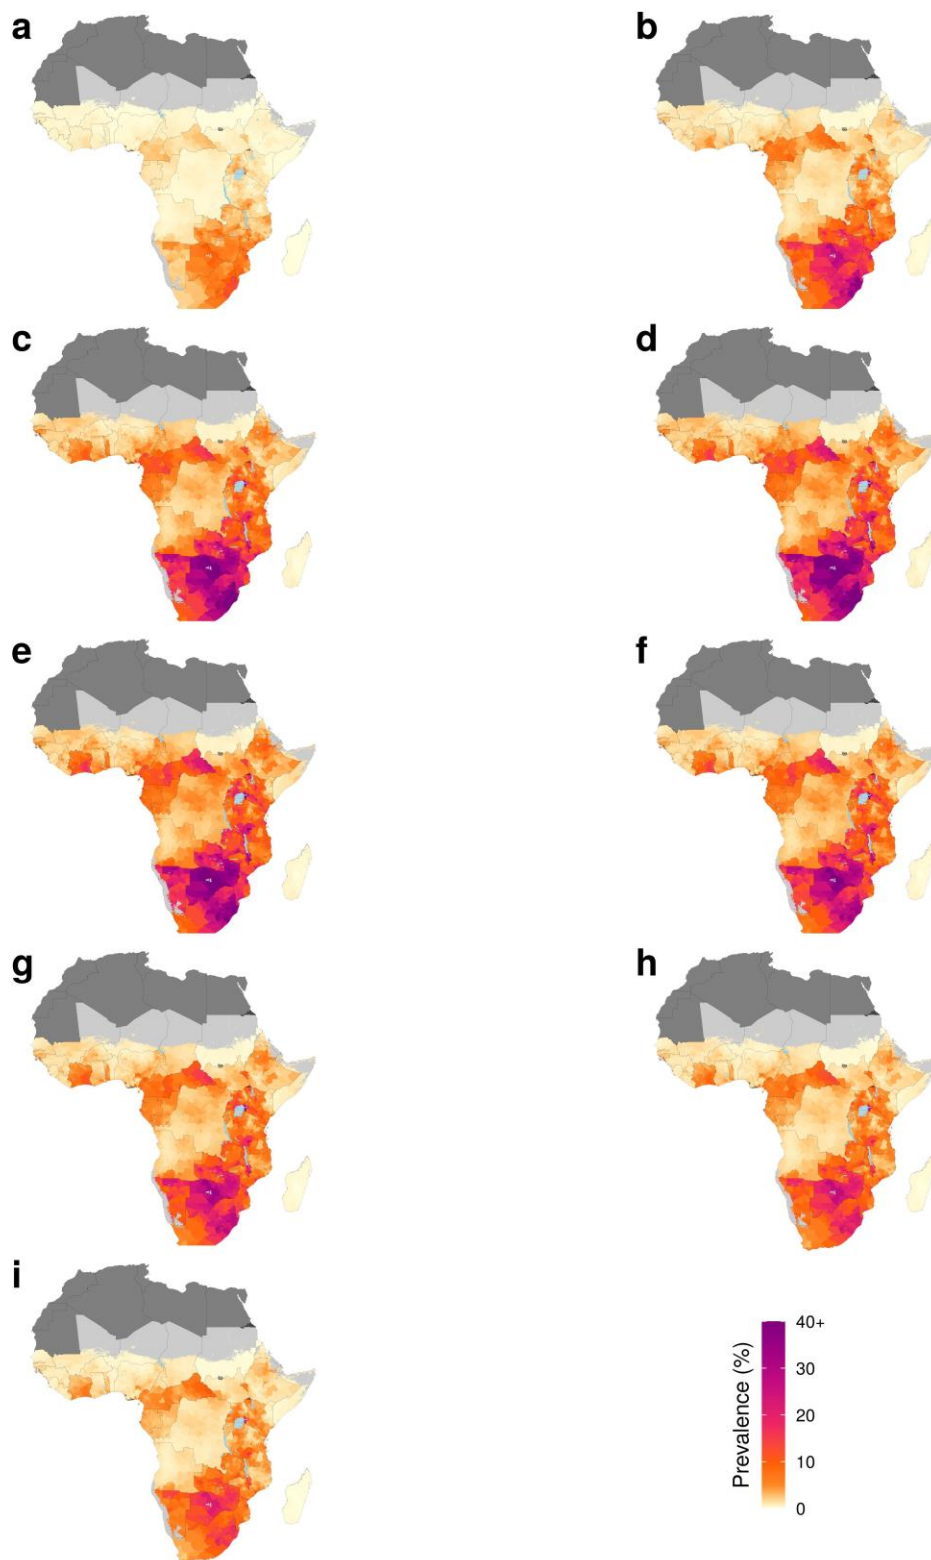

228

229 **Figure S22: Age-specific HIV prevalence in females, 2005.** Female HIV prevalence estimates in the year  
230 2005, at the second administrative level, for (a) ages 15–19 years; (b) ages 20-24 years; (c) ages 25-29  
231 years; (d) ages 30-34 years; (e) ages 35-39 years; (f) ages 40-44 years; (g) ages 45-49 years; (h) ages 50-54  
232 years; and (i) ages 55-59 years. Maps reflect national boundaries, land cover, lakes, and population; areas  
233 with fewer than ten people per 1 × 1 km, and classified as barren or sparsely vegetated, are colored light  
234 grey. Countries colored in dark grey were not included in the analysis.

235  
236

Figure S23: Age-specific HIV prevalence in males, 2010

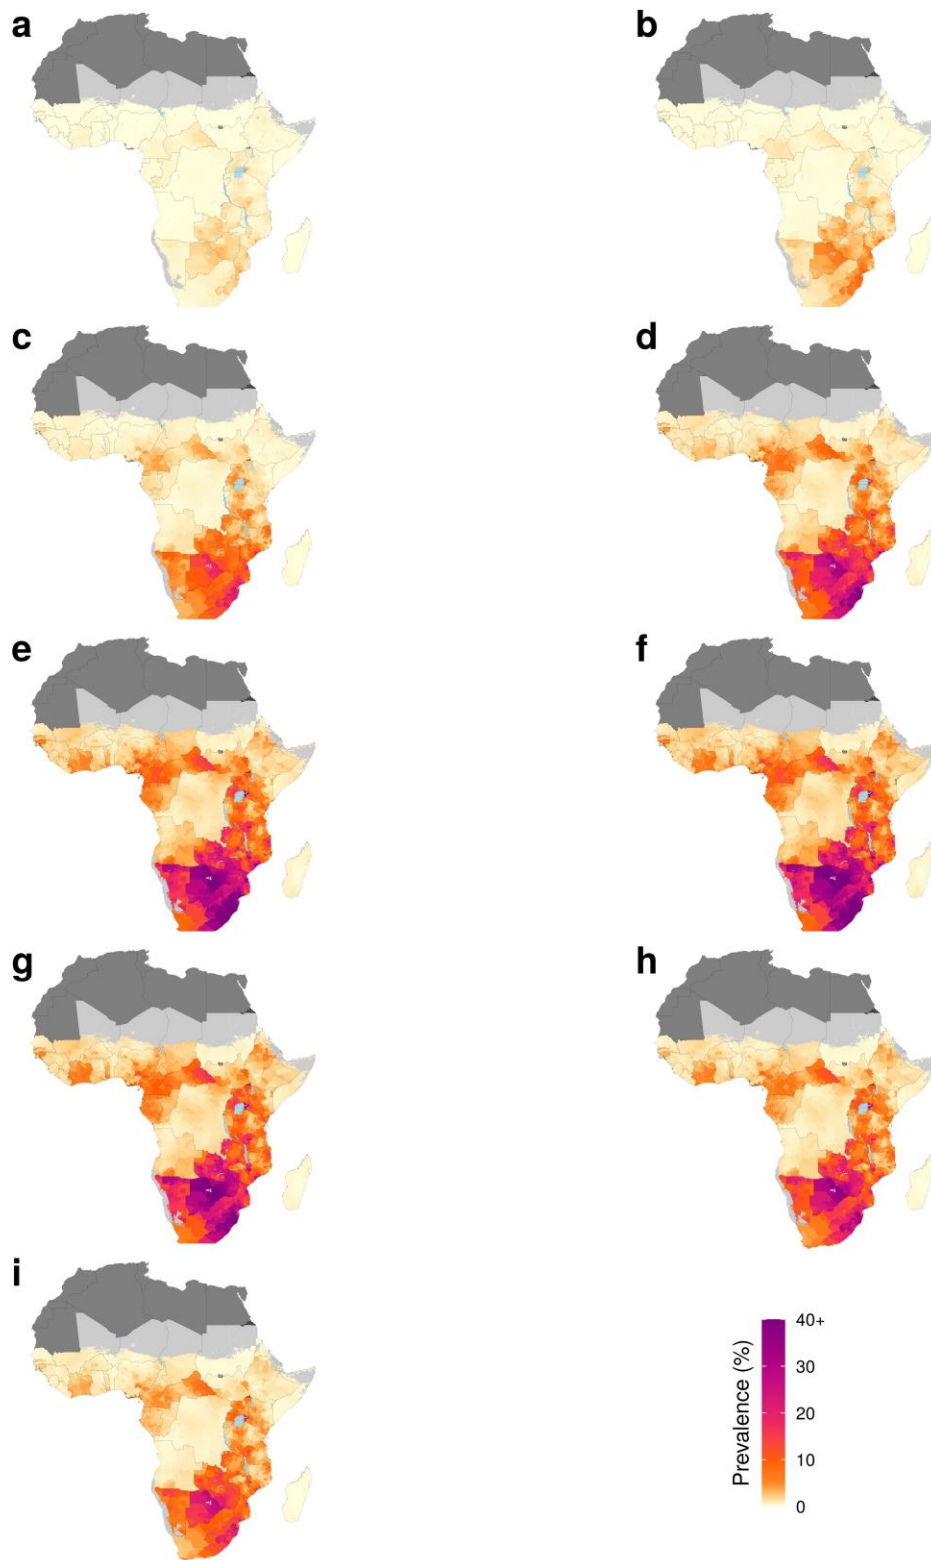

237



238 **Figure S23: Age-specific HIV prevalence in males, 2010.** Male HIV prevalence estimates in the year 2010, at  
239 the second administrative level, for (a) ages 15–19 years; (b) ages 20-24 years; (c) ages 25-29 years; (d)  
240 ages 30-34 years; (e) ages 35-39 years; (f) ages 40-44 years; (g) ages 45-49 years; (h) ages 50-54 years;  
241 and (i) ages 55-59 years. Maps reflect national boundaries, land cover, lakes, and population; areas with  
242 fewer than ten people per 1 × 1 km, and classified as barren or sparsely vegetated, are colored light grey.  
243 Countries colored in dark grey were not included in the analysis.

244  
245

Figure S24: Age-specific HIV prevalence in females, 2010

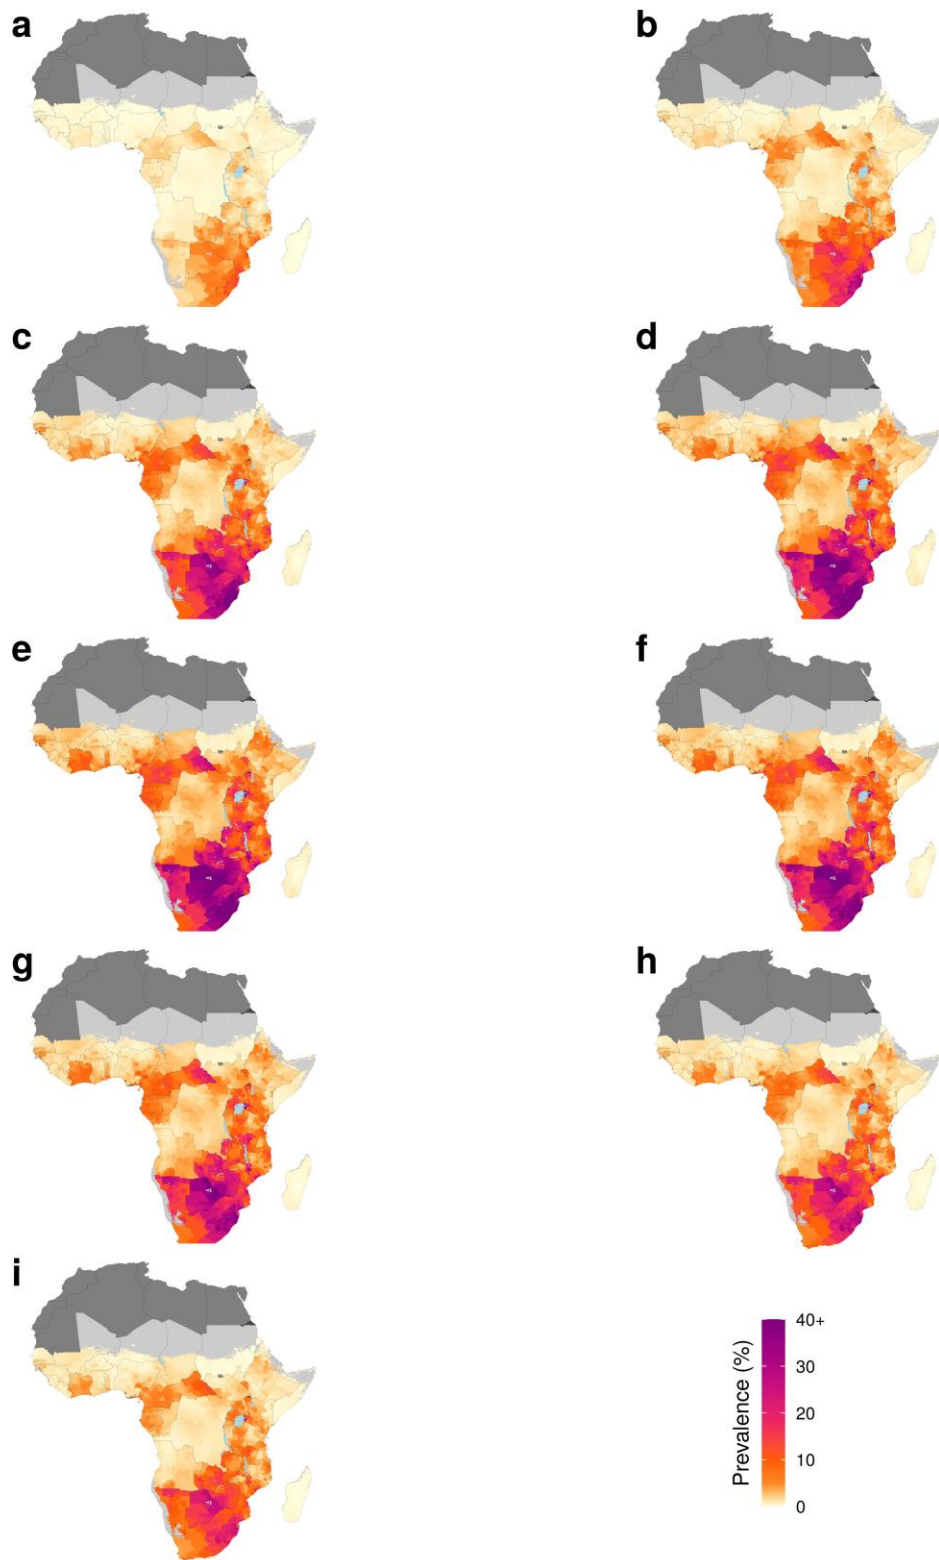

246

247 **Figure S24: Age-specific HIV prevalence in females, 2010.** Female HIV prevalence estimates in the year  
248 2010, at the second administrative level, for (a) ages 15–19 years; (b) ages 20-24 years; (c) ages 25-29  
249 years; (d) ages 30-34 years; (e) ages 35-39 years; (f) ages 40-44 years; (g) ages 45-49 years; (h) ages 50-54  
250 years; and (i) ages 55-59 years. Maps reflect national boundaries, land cover, lakes, and population; areas  
251 with fewer than ten people per 1 × 1 km, and classified as barren or sparsely vegetated, are colored light  
252 grey. Countries colored in dark grey were not included in the analysis.

253 Figure S25: Age-specific HIV prevalence in males, 2018

254

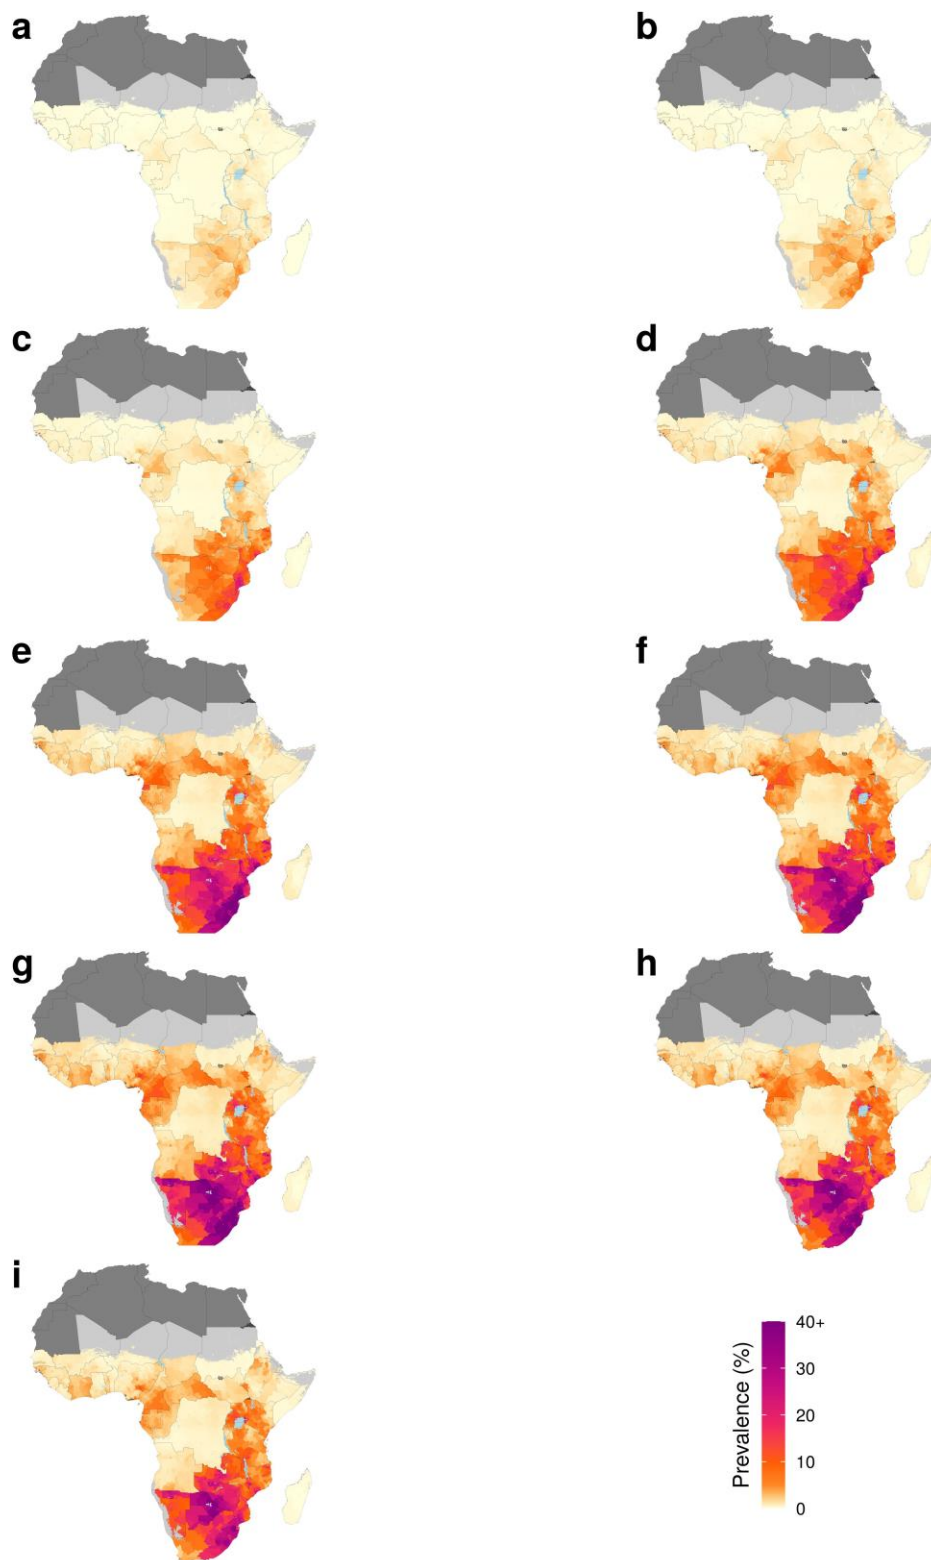

255



256 **Figure S25: Age-specific HIV prevalence in males, 2018.** Male HIV prevalence estimates in the year 2018, at  
257 the second administrative level, for (a) ages 15–19 years; (b) ages 20-24 years; (c) ages 25-29 years; (d)  
258 ages 30-34 years; (e) ages 35-39 years; (f) ages 40-44 years; (g) ages 45-49 years; (h) ages 50-54 years;  
259 and (i) ages 55-59 years. Maps reflect national boundaries, land cover, lakes, and population; areas with  
260 fewer than ten people per 1 × 1 km, and classified as barren or sparsely vegetated, are colored light grey.  
261 Countries colored in dark grey were not included in the analysis.

262 Figure S26: Age-specific HIV prevalence in females, 2018

263

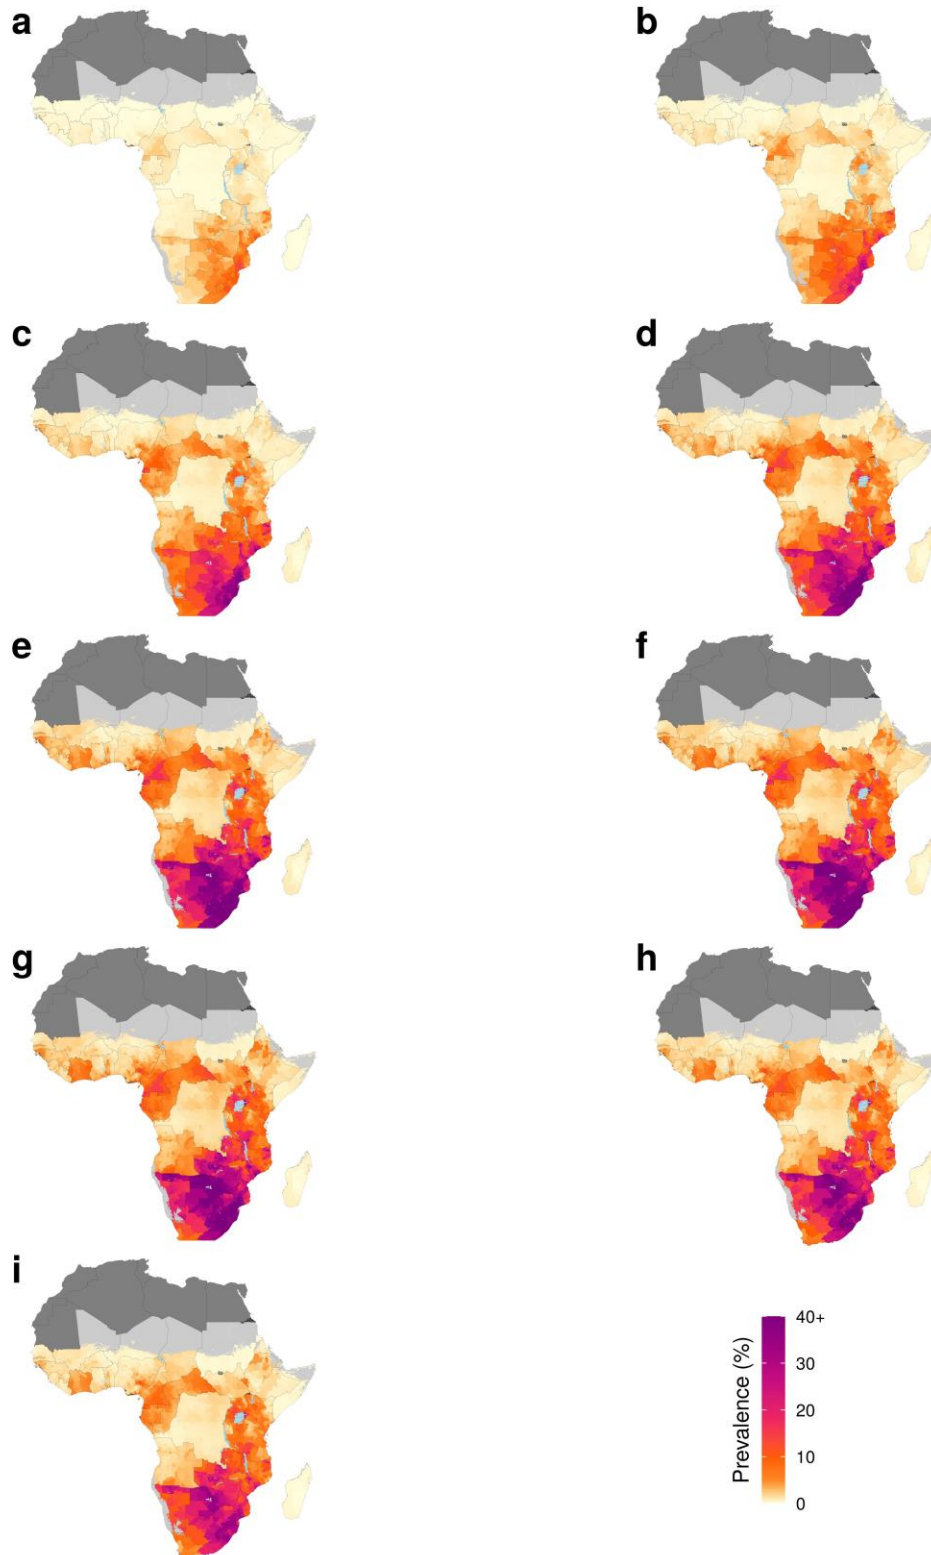

264

265 **Figure S26: Age-specific HIV prevalence in females, 2018.** Female HIV prevalence estimates in the year  
266 2018, at the second administrative level, for (a) ages 15–19 years; (b) ages 20-24 years; (c) ages 25-29  
267 years; (d) ages 30-34 years; (e) ages 35-39 years; (f) ages 40-44 years; (g) ages 45-49 years; (h) ages 50-54  
268 years; and (i) ages 55-59 years. Maps reflect national boundaries, land cover, lakes, and population; areas  
269 with fewer than ten people per 1 × 1 km, and classified as barren or sparsely vegetated, are colored light  
270 grey. Countries colored in dark grey were not included in the analysis.

271 Figure S27: Age-specific uncertainty interval range estimates in males,  
272 2000

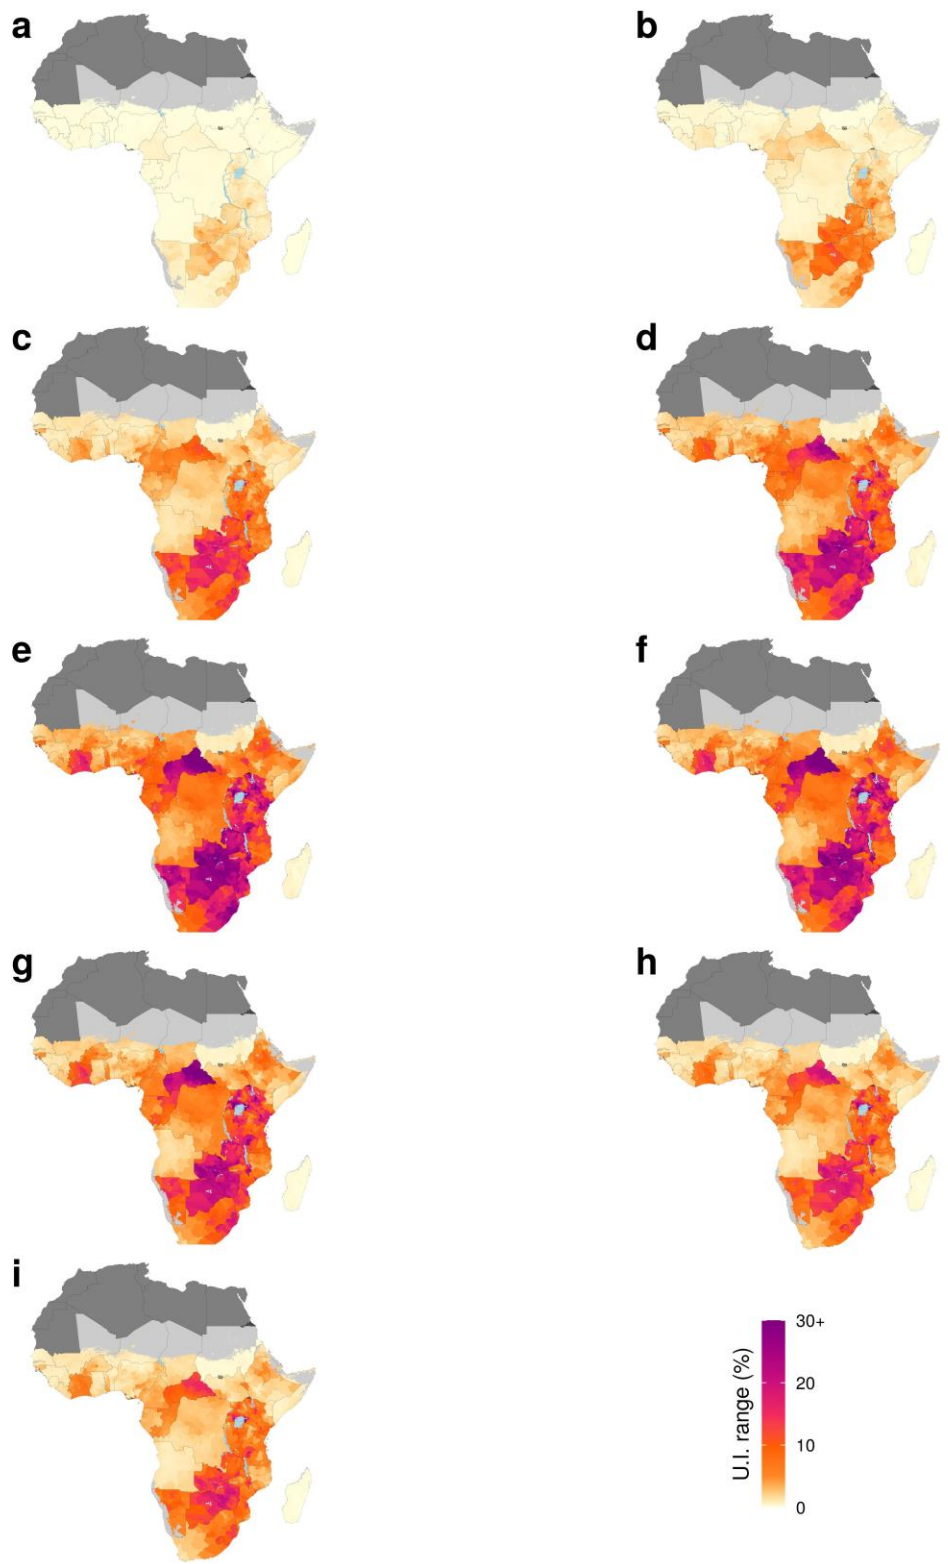

273



274 **Figure S27: Age-specific uncertainty interval range estimates in males, 2000.** Uncertainty interval range for  
275 male HIV prevalence estimates in the year 2000, at the second administrative level, for **(a)** ages 15–19  
276 years; **(b)** ages 20–24 years; **(c) ages 25–29 years; (d) ages 30–34 years; (e) ages 35–39 years; (f) ages 40–44**  
277 **years; (g) ages 45–49 years; (h) ages 50–54 years; and (i) ages 55–59 years.** Maps reflect national  
278 boundaries, land cover, lakes, and population; areas with fewer than ten people per 1 × 1 km, and  
279 classified as barren or sparsely vegetated, are colored light grey. Countries colored in dark grey were not  
280 included in the analysis.

281 Figure S28: Age-specific uncertainty interval range estimates in females,  
282 2000

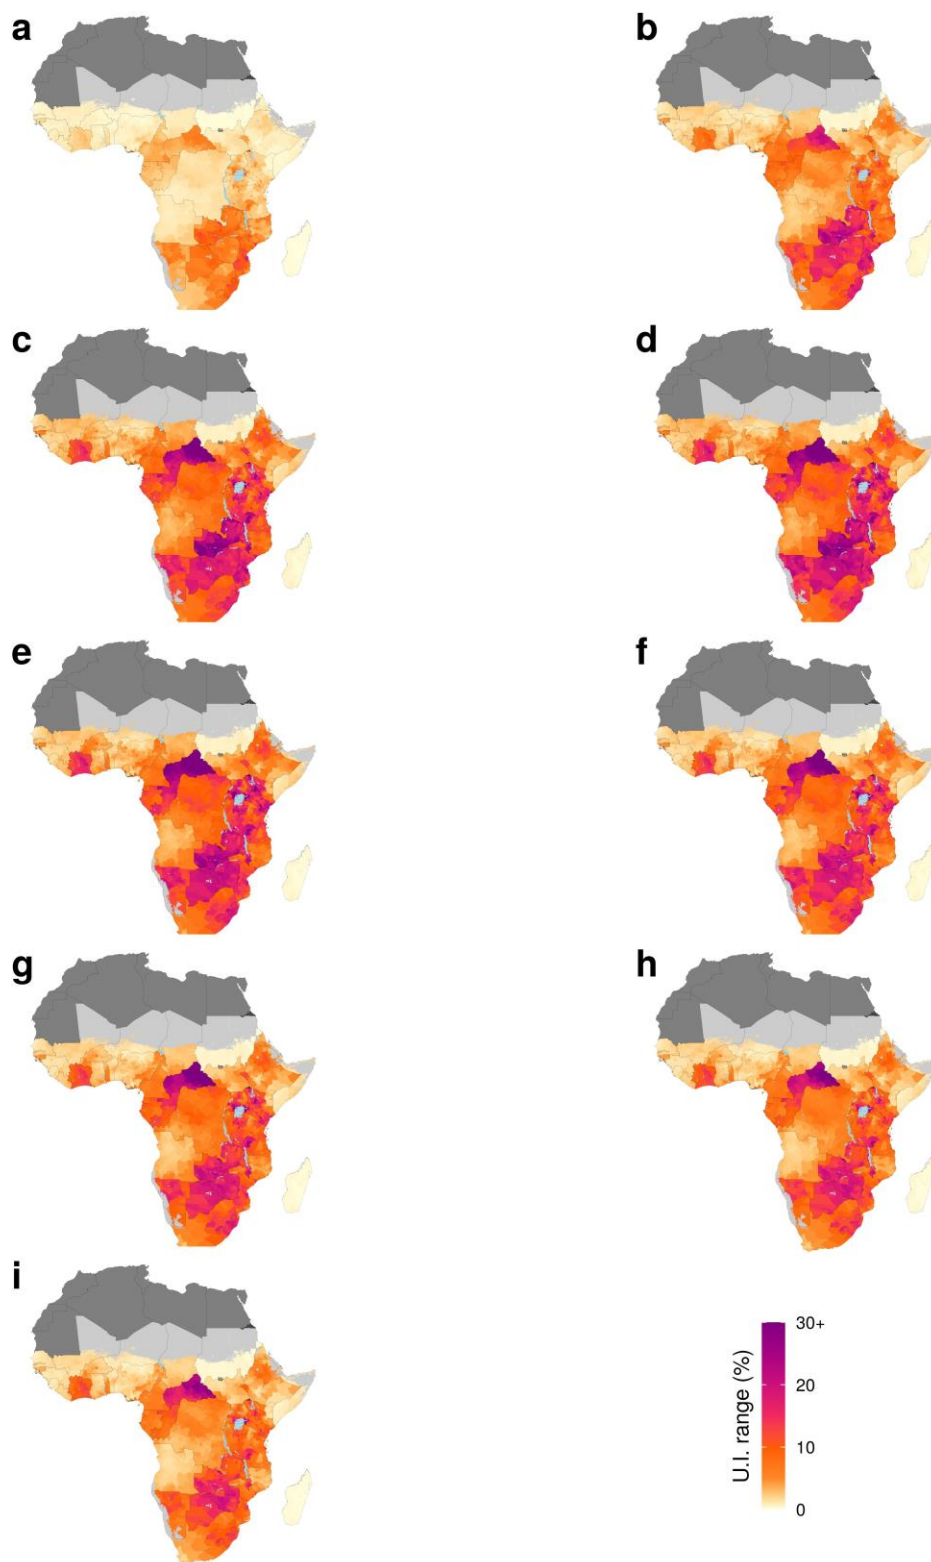

283

284 **Figure S28: Age-specific uncertainty interval range estimates in females, 2000.** Uncertainty interval range  
285 for female HIV prevalence estimates in the year 2000, at the second administrative level, for (a) ages 15–  
286 19 years; (b) ages 20-24 years; (c) ages 25-29 years; (d) ages 30-34 years; (e) ages 35-39 years; (f) ages 40-  
287 44 years; (g) ages 45-49 years; (h) ages 50-54 years; and (i) ages 55-59 years. Maps reflect national  
288 boundaries, land cover, lakes, and population; areas with fewer than ten people per 1 × 1 km, and  
289 classified as barren or sparsely vegetated, are colored light grey. Countries colored in dark grey were not  
290 included in the analysis.

291 Figure S29: Age-specific uncertainty interval range estimates in males,  
292 2005

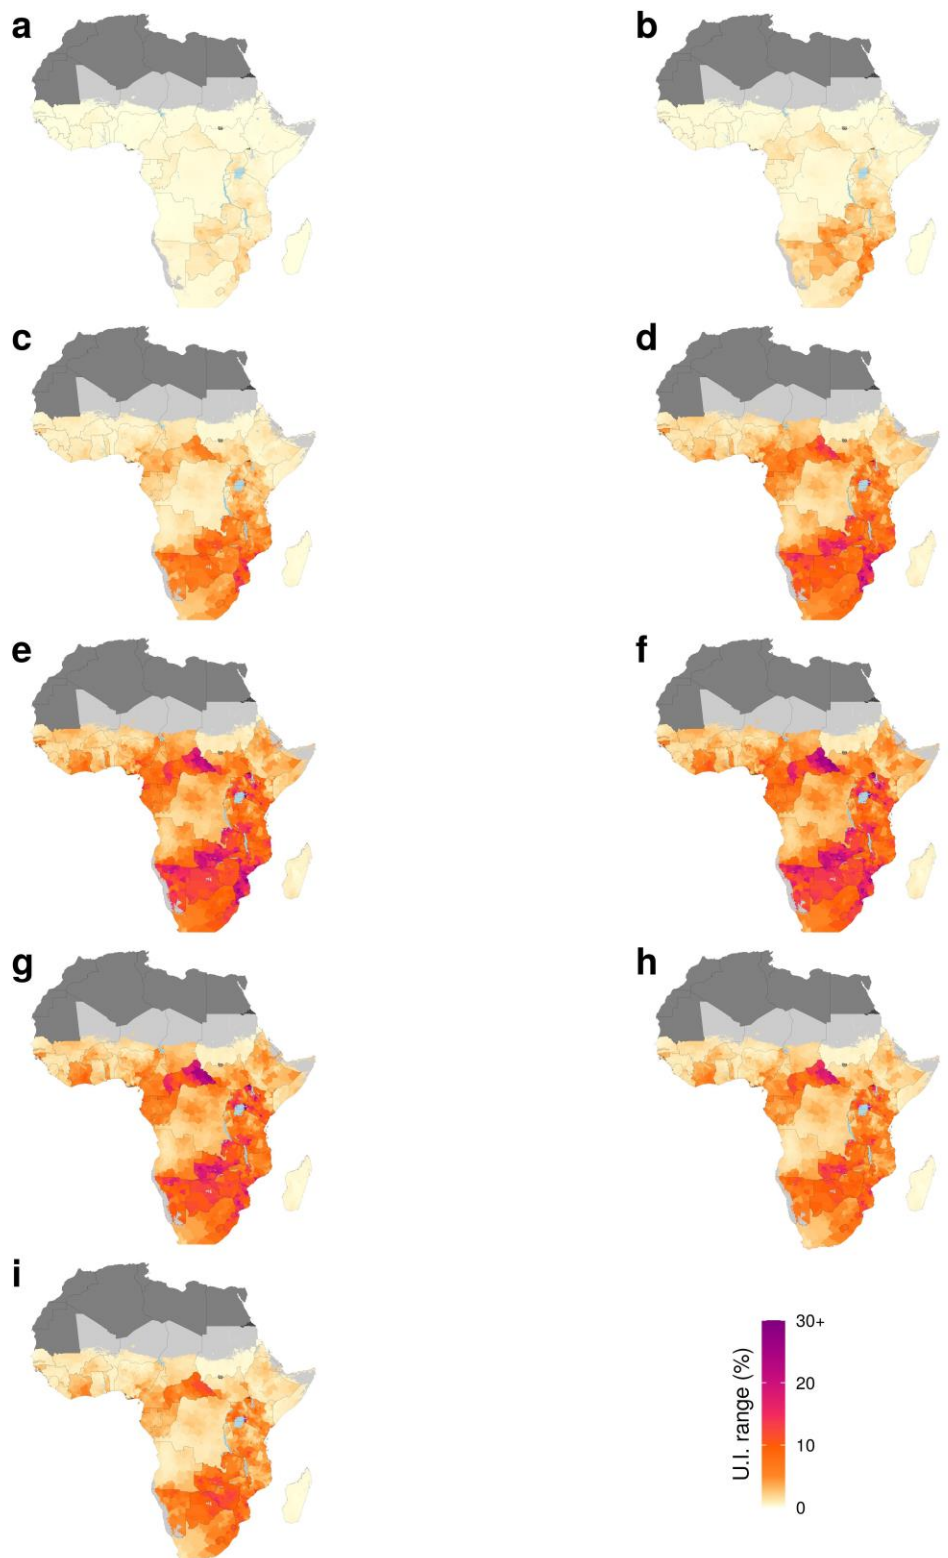

293

294 **Figure S29: Age-specific uncertainty interval range estimates in males, 2005.** Uncertainty interval range for  
295 male HIV prevalence estimates in the year 2005, at the second administrative level, for (a) ages 15–19  
296 years; (b) ages 20-24 years; (c) ages 25-29 years; (d) ages 30-34 years; (e) ages 35-39 years; (f) ages 40-44  
297 years; (g) ages 45-49 years; (h) ages 50-54 years; and (i) ages 55-59 years. Maps reflect national  
298 boundaries, land cover, lakes, and population; areas with fewer than ten people per 1 × 1 km, and  
299 classified as barren or sparsely vegetated, are colored light grey. Countries colored in dark grey were not  
300 included in the analysis.



301 Figure S30: Age-specific uncertainty interval range estimates in females,  
302 2005

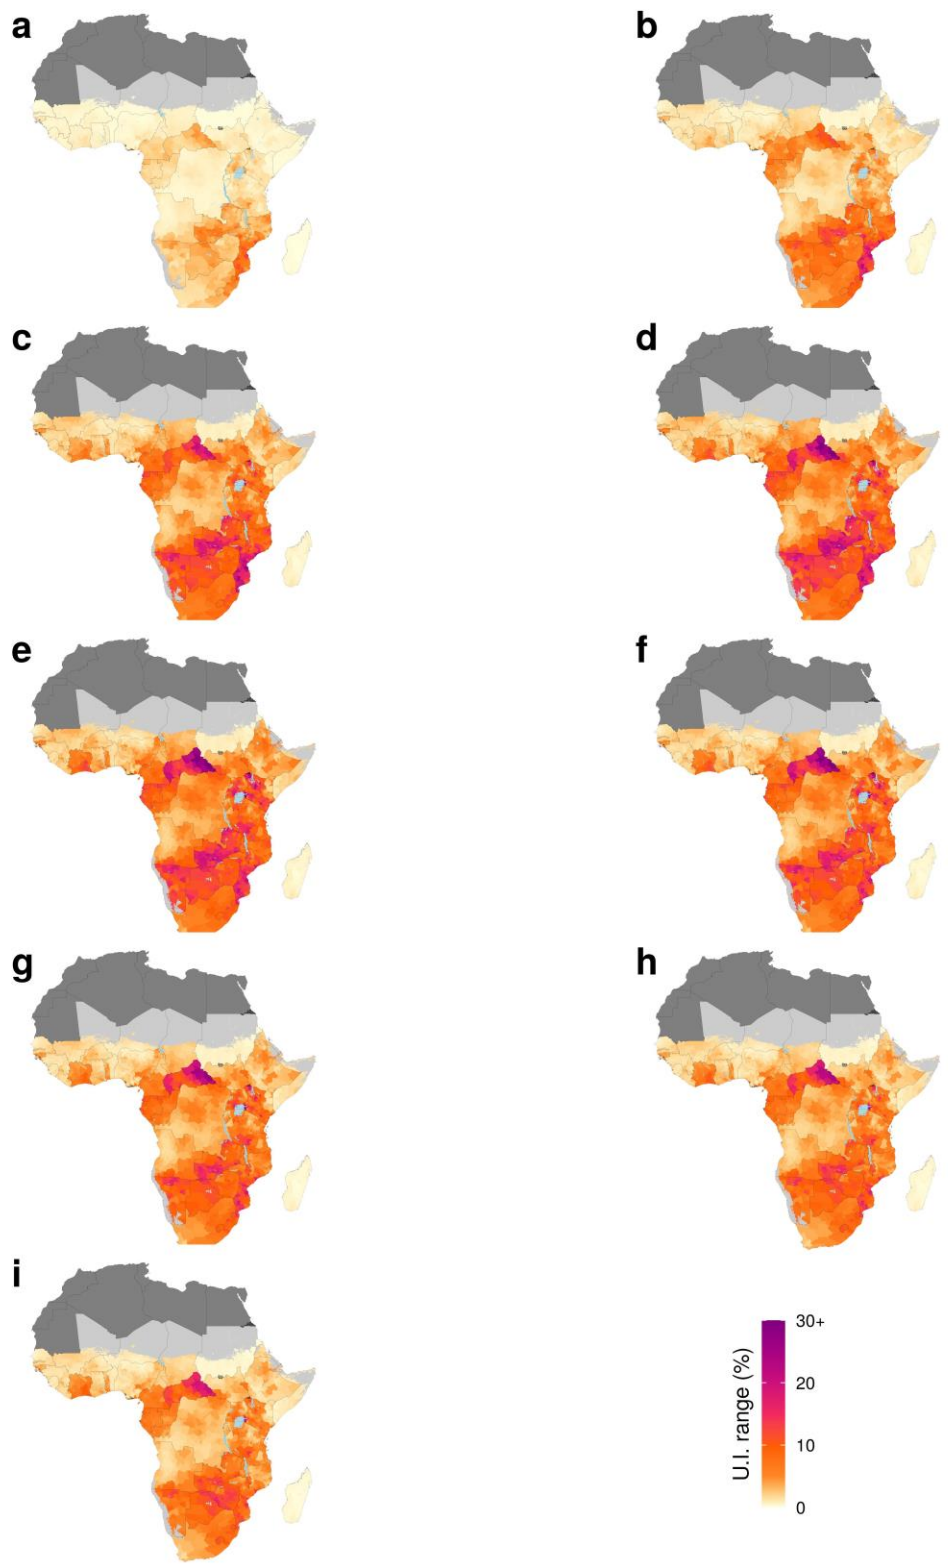

303

304 **Figure S30: Age-specific uncertainty interval range estimates in females, 2005.** Uncertainty interval range  
305 for female HIV prevalence estimates in the year 2005, at the second administrative level, for (a) ages 15–  
306 19 years; (b) ages 20-24 years; (c) ages 25-29 years; (d) ages 30-34 years; (e) ages 35-39 years; (f) ages 40-  
307 44 years; (g) ages 45-49 years; (h) ages 50-54 years; and (i) ages 55-59 years. Maps reflect national  
308 boundaries, land cover, lakes, and population; areas with fewer than ten people per 1 × 1 km, and  
309 classified as barren or sparsely vegetated, are colored light grey. Countries colored in dark grey were not  
310 included in the analysis.

311 Figure S31: Age-specific uncertainty interval range estimates in males,  
312 2010

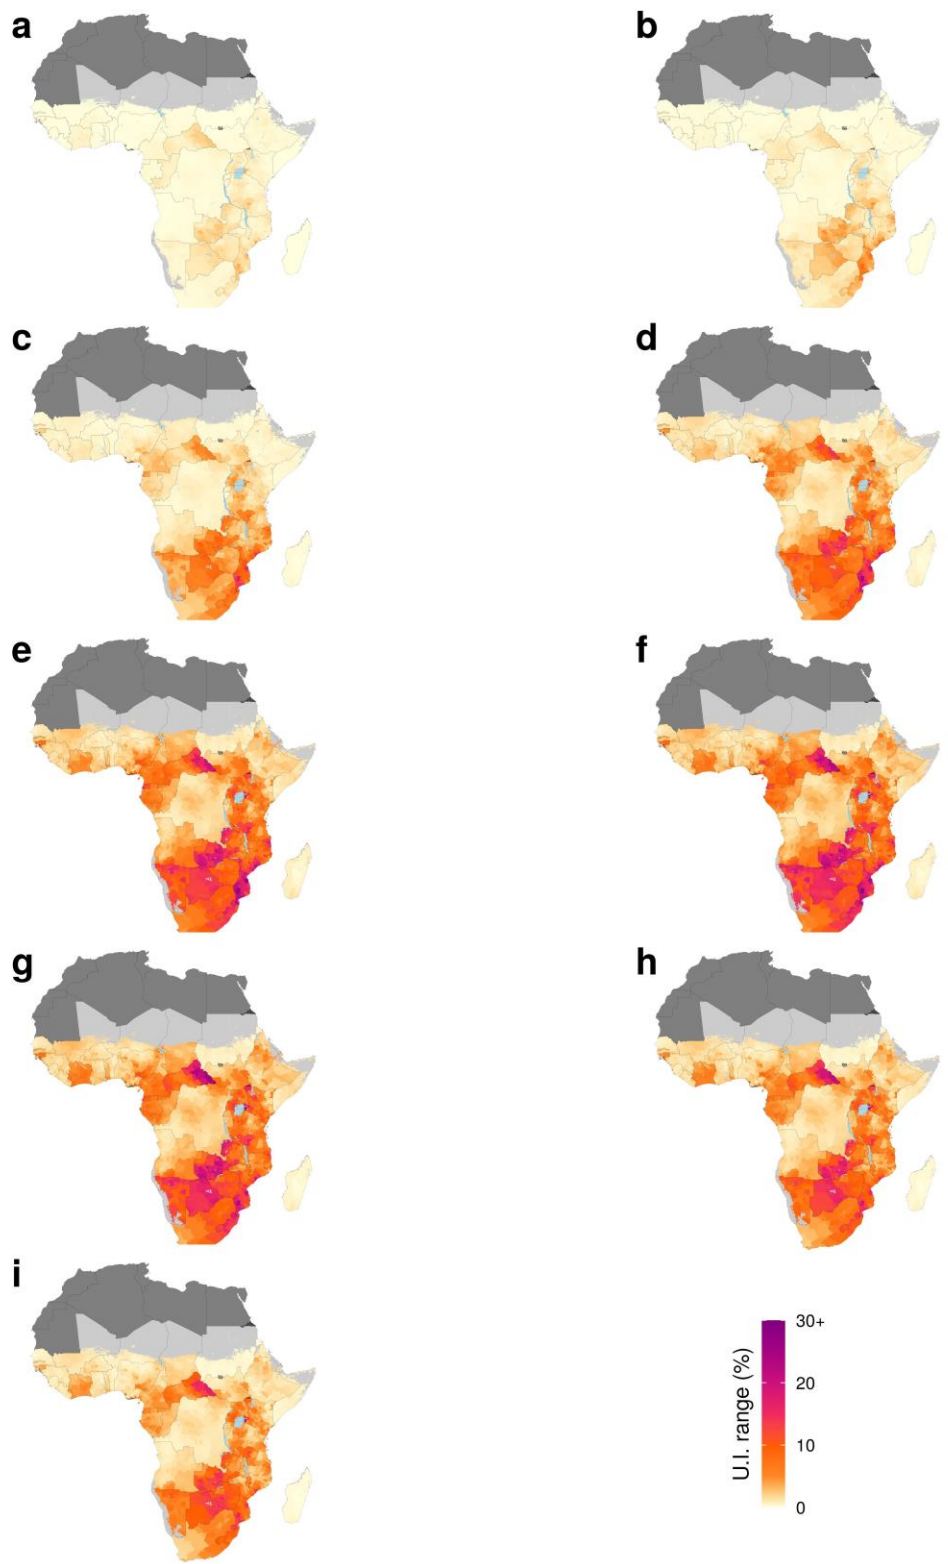

313

314 **Figure S31: Age-specific uncertainty interval range estimates in males, 2010.** Uncertainty interval range for  
315 male HIV prevalence estimates in the year 2010, at the second administrative level, for (a) ages 15–19  
316 years; (b) ages 20-24 years; (c) ages 25-29 years; (d) ages 30-34 years; (e) ages 35-39 years; (f) ages 40-44  
317 years; (g) ages 45-49 years; (h) ages 50-54 years; and (i) ages 55-59 years. Maps reflect national  
318 boundaries, land cover, lakes, and population; areas with fewer than ten people per 1 × 1 km, and  
319 classified as barren or sparsely vegetated, are colored light grey. Countries colored in dark grey were not  
320 included in the analysis.

321 Figure S32: Age-specific uncertainty interval range estimates in females,  
322 2010

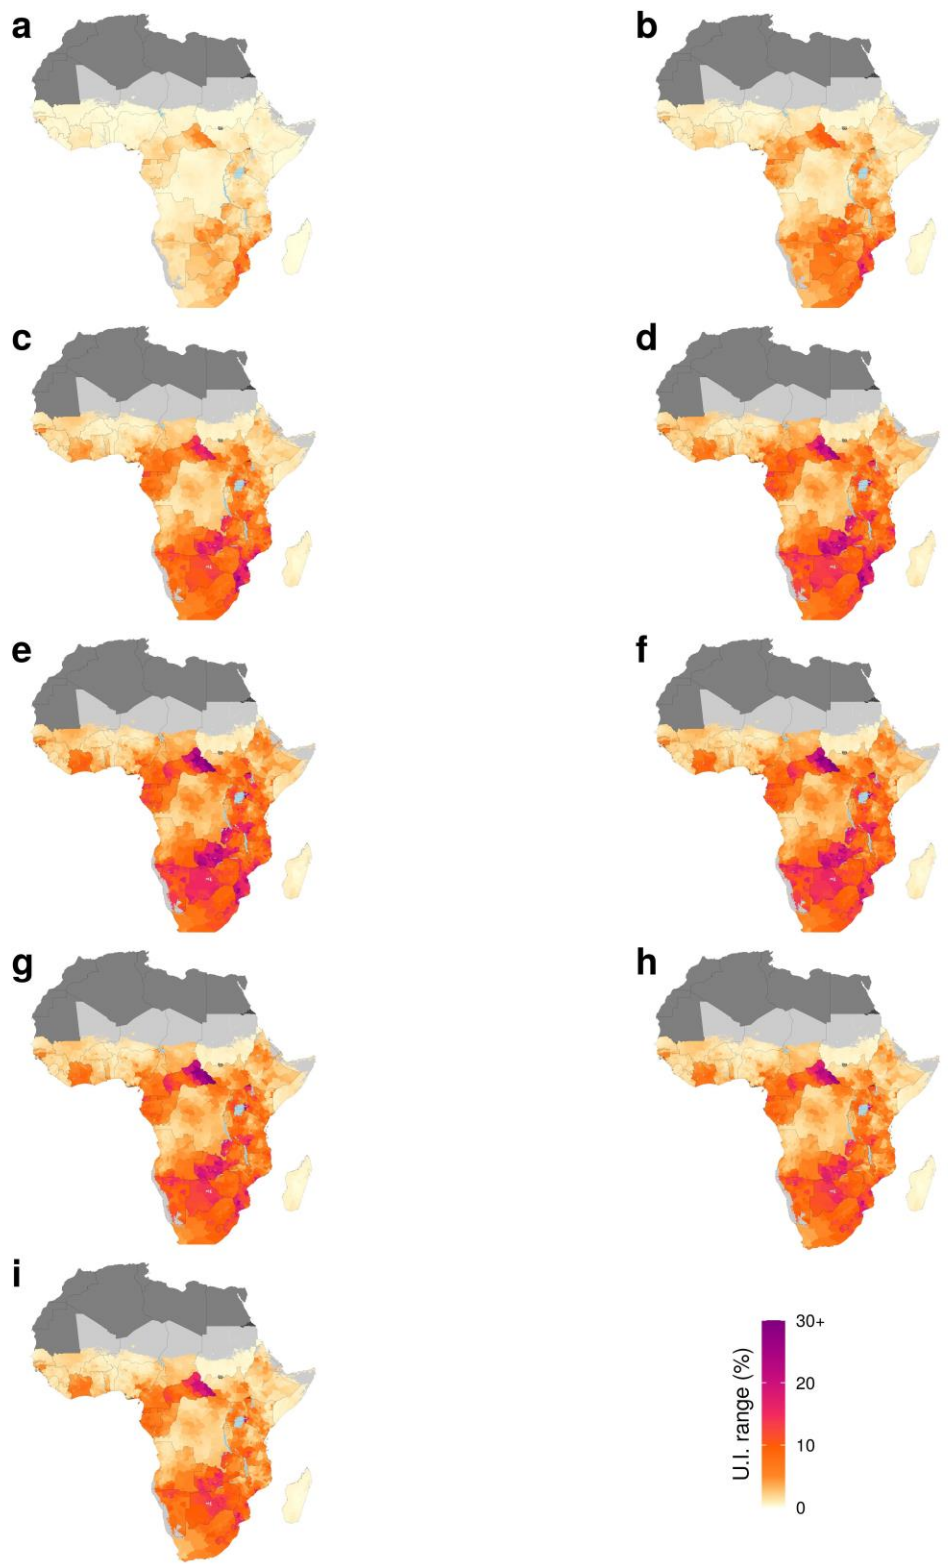

323

324 **Figure S32: Age-specific uncertainty interval range estimates in females, 2010.** Uncertainty interval range  
325 for female HIV prevalence estimates in the year 2010, at the second administrative level, for **(a)** ages 15–  
326 19 years; **(b)** ages 20-24 years; **(c) ages 25-29 years; (d) ages 30-34 years; (e) ages 35-39 years; (f) ages 40-**  
327 **44 years; (g) ages 45-49 years; (h) ages 50-54 years; and (i) ages 55-59 years.** Maps reflect national  
328 boundaries, land cover, lakes, and population; areas with fewer than ten people per 1 × 1 km, and  
329 classified as barren or sparsely vegetated, are colored light grey. Countries colored in dark grey were not  
330 included in the analysis.



331 Figure S33: Age-specific uncertainty interval range estimates in males,  
332 2018

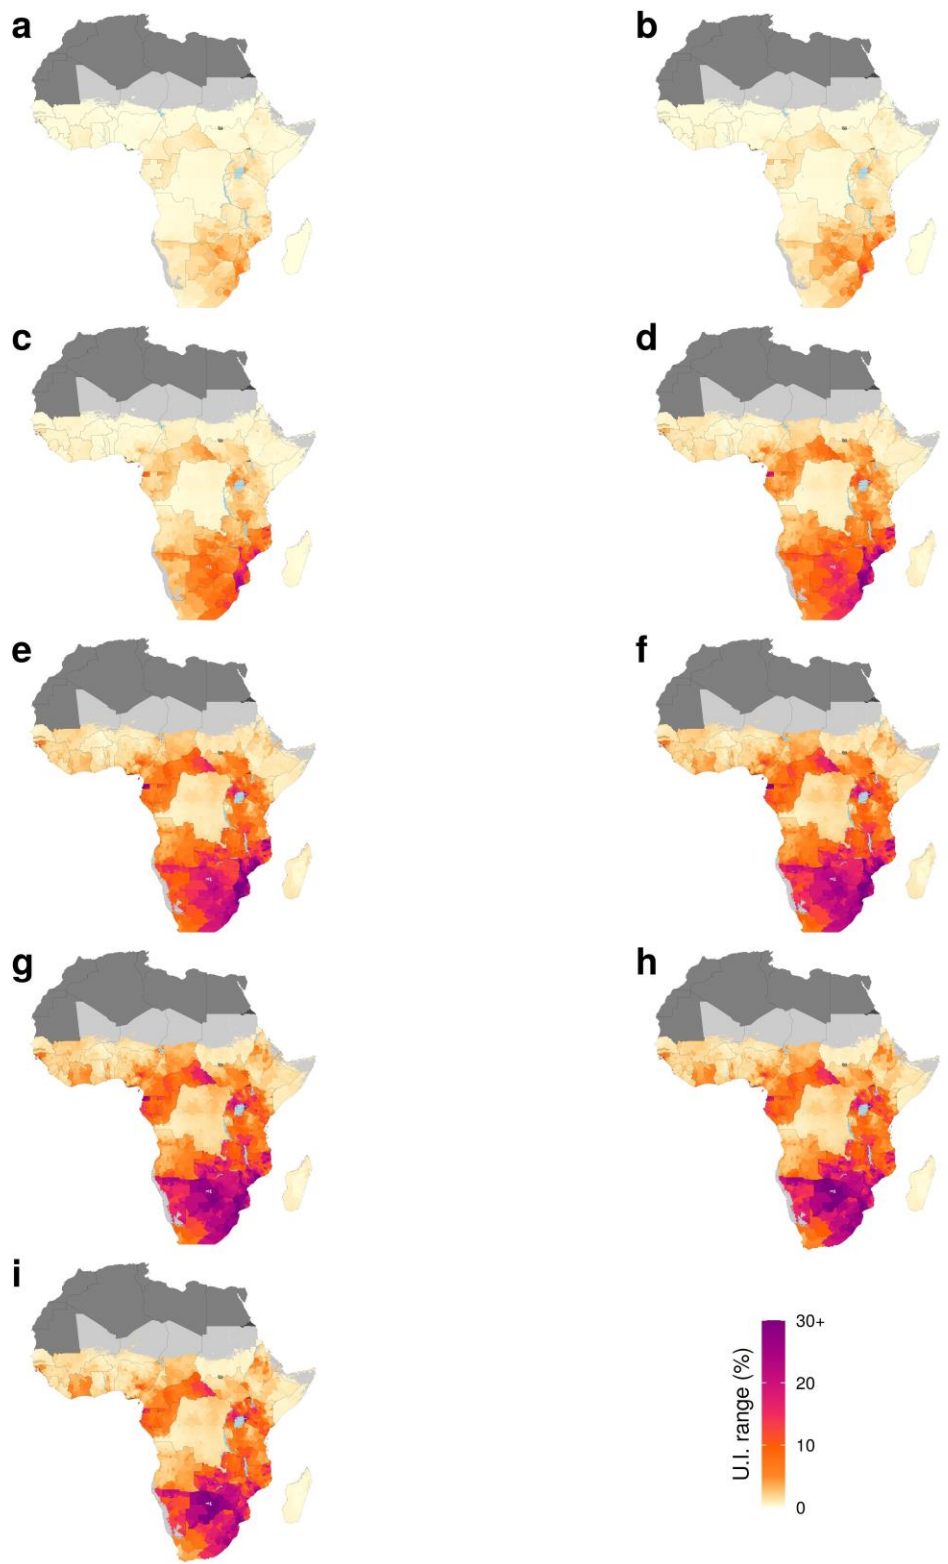

333

334 **Figure S33: Age-specific uncertainty interval range estimates in males, 2018.** Uncertainty interval range for  
335 male HIV prevalence estimates in the year 2018, at the second administrative level, for (a) ages 15–19  
336 years; (b) ages 20-24 years; (c) ages 25-29 years; (d) ages 30-34 years; (e) ages 35-39 years; (f) ages 40-44  
337 years; (g) ages 45-49 years; (h) ages 50-54 years; and (i) ages 55-59 years. Maps reflect national  
338 boundaries, land cover, lakes, and population; areas with fewer than ten people per 1 × 1 km, and  
339 classified as barren or sparsely vegetated, are colored light grey. Countries colored in dark grey were not  
340 included in the analysis.

341 Figure S34: Age-specific uncertainty interval range estimates in females,  
342 2018

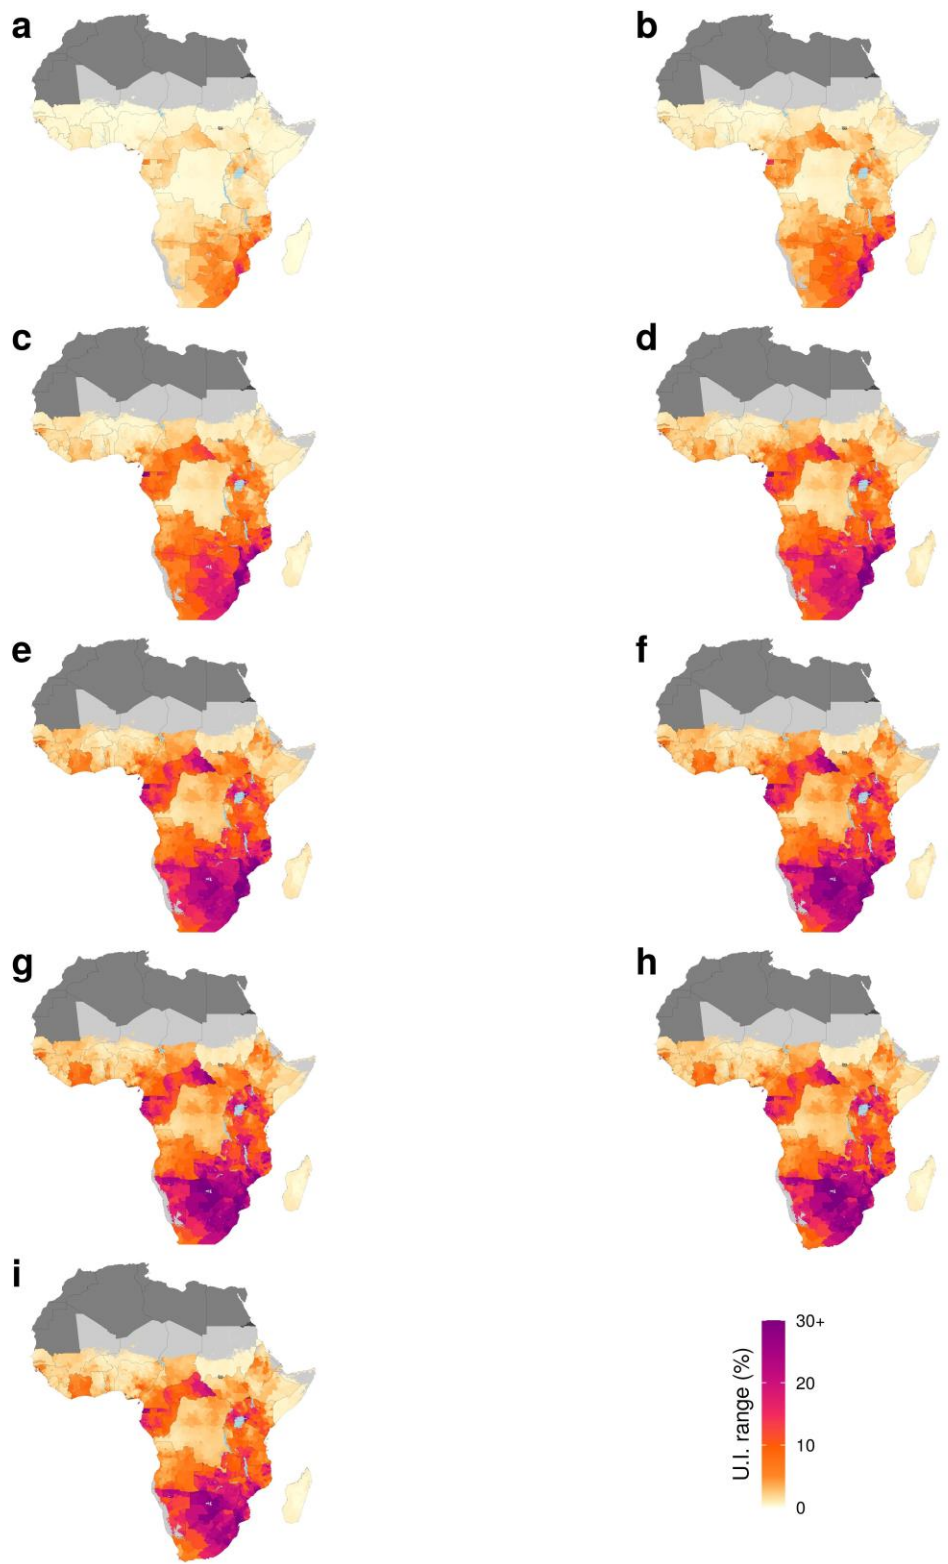

343

344 **Figure S34: Age-specific uncertainty interval range estimates in females, 2018.** Uncertainty interval range  
345 for female HIV prevalence estimates in the year 2010, at the second administrative level, for (a) ages 15–  
346 19 years; (b) ages 20-24 years; (c) ages 25-29 years; (d) ages 30-34 years; (e) ages 35-39 years; (f) ages 40-  
347 44 years; (g) ages 45-49 years; (h) ages 50-54 years; and (i) ages 55-59 years. Maps reflect national  
348 boundaries, land cover, lakes, and population; areas with fewer than ten people per 1 × 1 km, and  
349 classified as barren or sparsely vegetated, are colored light grey. Countries colored in dark grey were not  
350 included in the analysis.

351 Figure S35: Change in HIV prevalence in males, 2000–2005

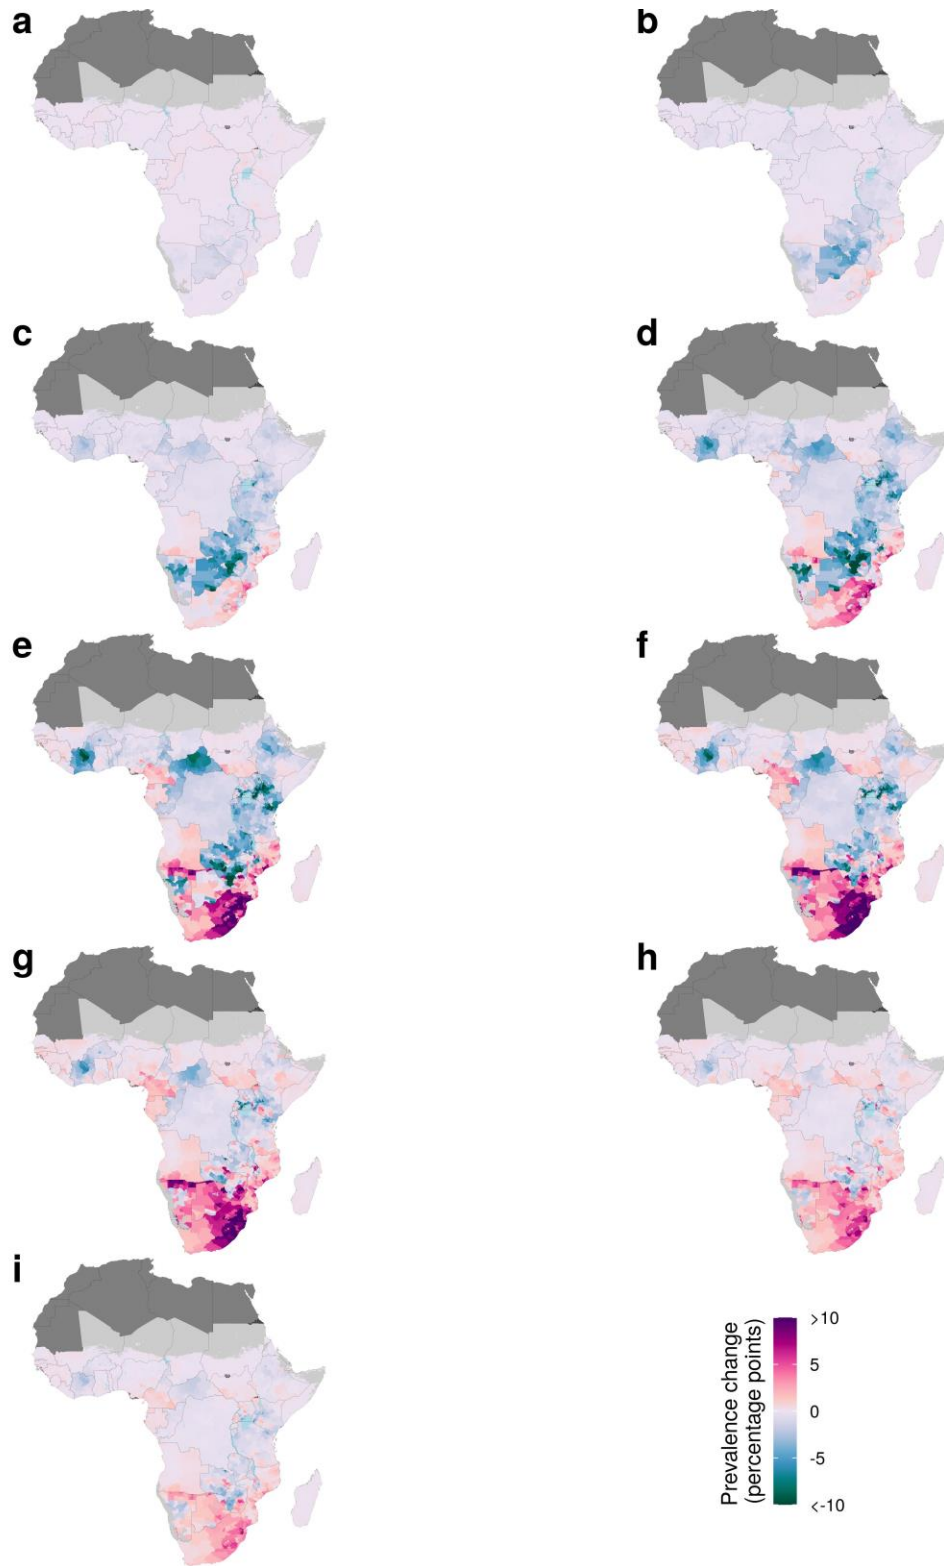

352

353 **Figure S35: Change in HIV prevalence in males, 2000-2005.** Absolute change in male HIV prevalence at the  
354 second administrative level for (a) ages 15–19 years; (b) ages 20-24 years; (c) ages 25-29 years; (d) ages  
355 30-34 years; (e) ages 35-39 years; (f) ages 40-44 years; (g) ages 45-49 years; (h) ages 50-54 years; and (i)  
356 ages 55-59 years. Maps reflect national boundaries, land cover, lakes, and population; areas with fewer  
357 than ten people per 1 × 1 km, and classified as barren or sparsely vegetated, are colored light grey.  
358 Countries colored in dark grey were not included in the analysis.



359 Figure S36: Change in HIV prevalence in females, 2000–2005

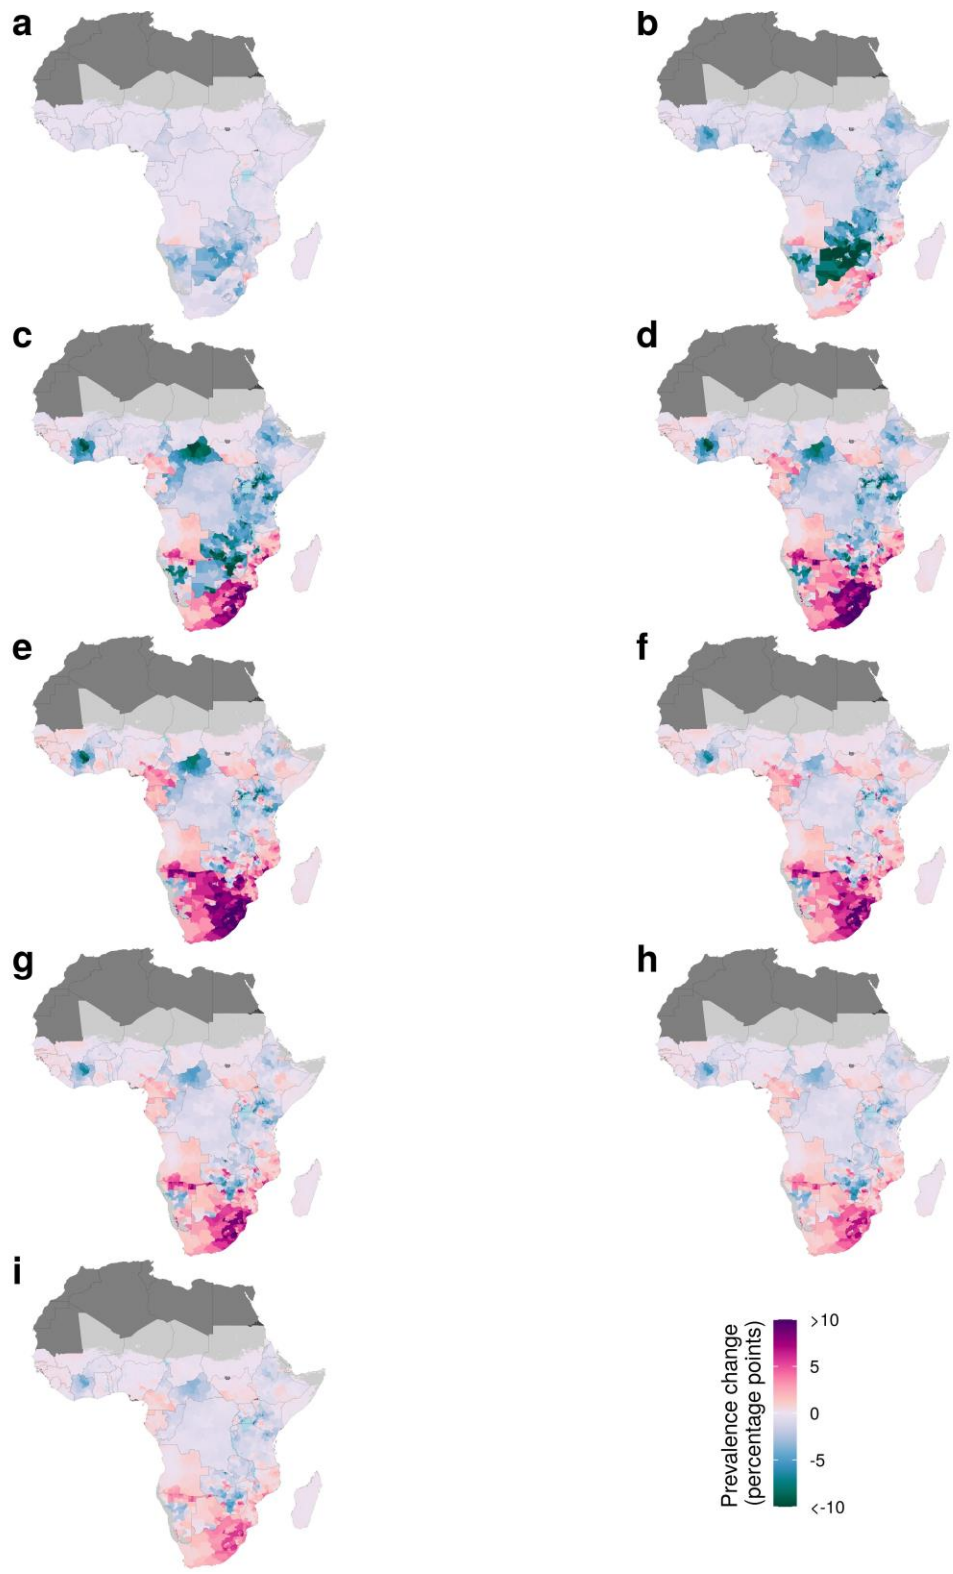

360

361 **Figure S36: Change in HIV prevalence in females, 2000-2005.** Absolute change in female HIV prevalence at  
362 the second administrative level for (a) ages 15–19 years; (b) ages 20-24 years; (c) ages 25-29 years; (d)  
363 ages 30-34 years; (e) ages 35-39 years; (f) ages 40-44 years; (g) ages 45-49 years; (h) ages 50-54 years;  
364 and (i) ages 55-59 years. Maps reflect national boundaries, land cover, lakes, and population; areas with  
365 fewer than ten people per 1 × 1 km, and classified as barren or sparsely vegetated, are colored light grey.  
366 Countries colored in dark grey were not included in the analysis.

367 Figure S37: Change in HIV prevalence in males, 2005–2010

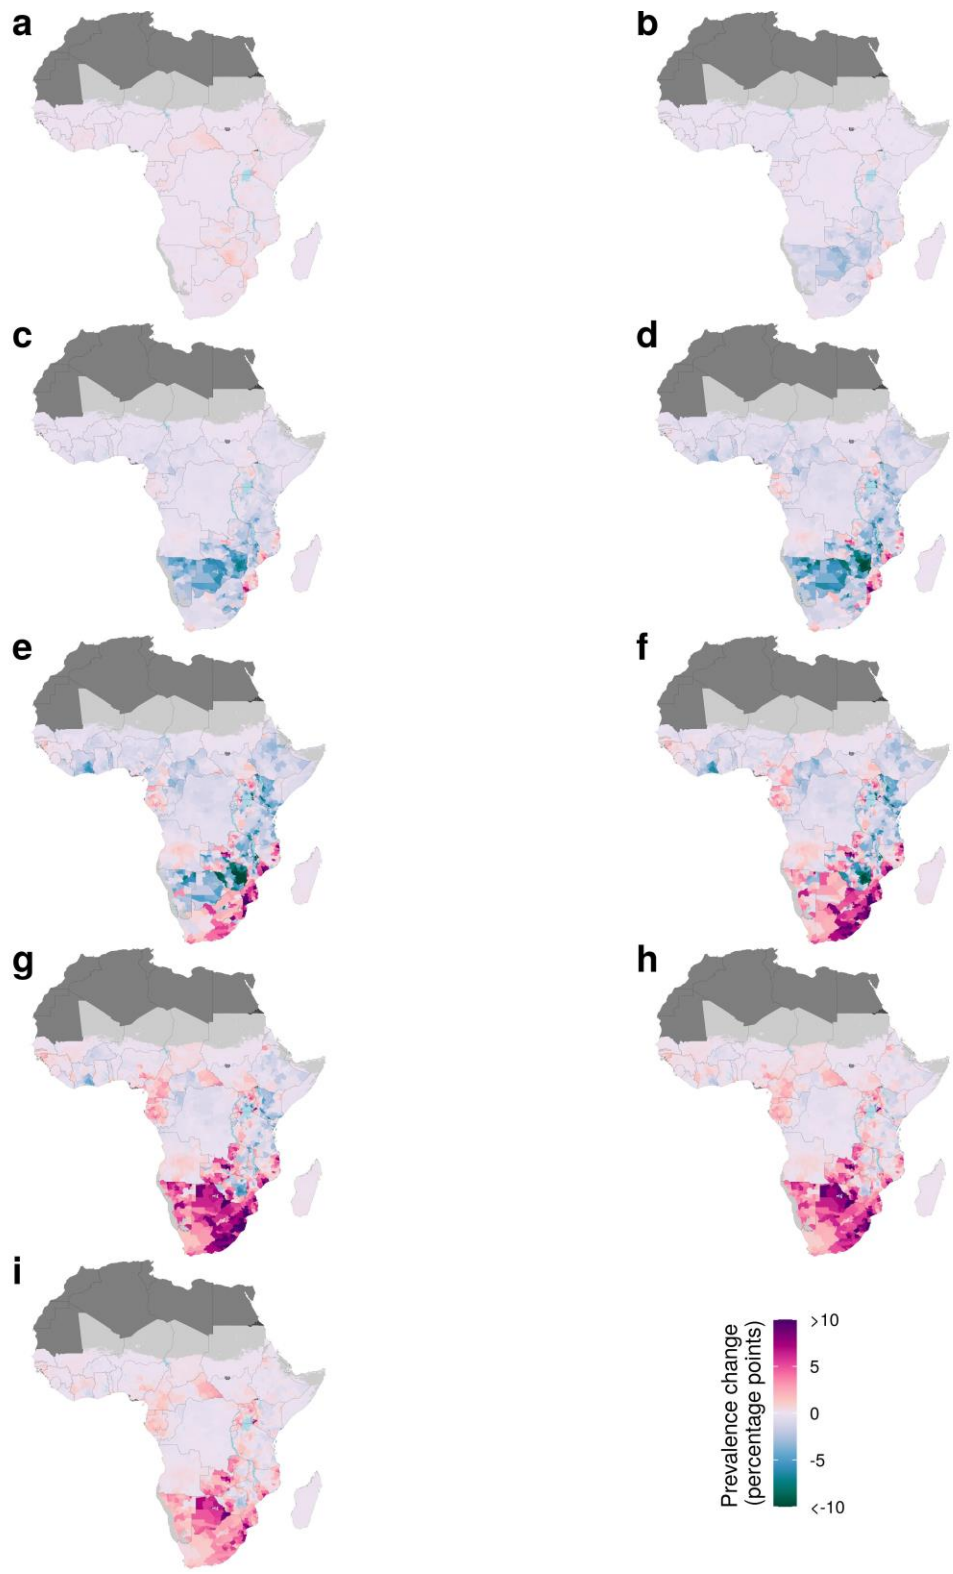

368

369 **Figure S37: Change in HIV prevalence in males, 2005-2010.** Absolute change in male HIV prevalence at the  
370 second administrative level for (a) ages 15–19 years; (b) ages 20-24 years; (c) ages 25-29 years; (d) ages  
371 30-34 years; (e) ages 35-39 years; (f) ages 40-44 years; (g) ages 45-49 years; (h) ages 50-54 years; and (i)  
372 ages 55-59 years. Maps reflect national boundaries, land cover, lakes, and population; areas with fewer  
373 than ten people per 1 × 1 km, and classified as barren or sparsely vegetated, are colored light grey.  
374 Countries colored in dark grey were not included in the analysis.

375 Figure S38: Change in HIV prevalence in females, 2005–2010

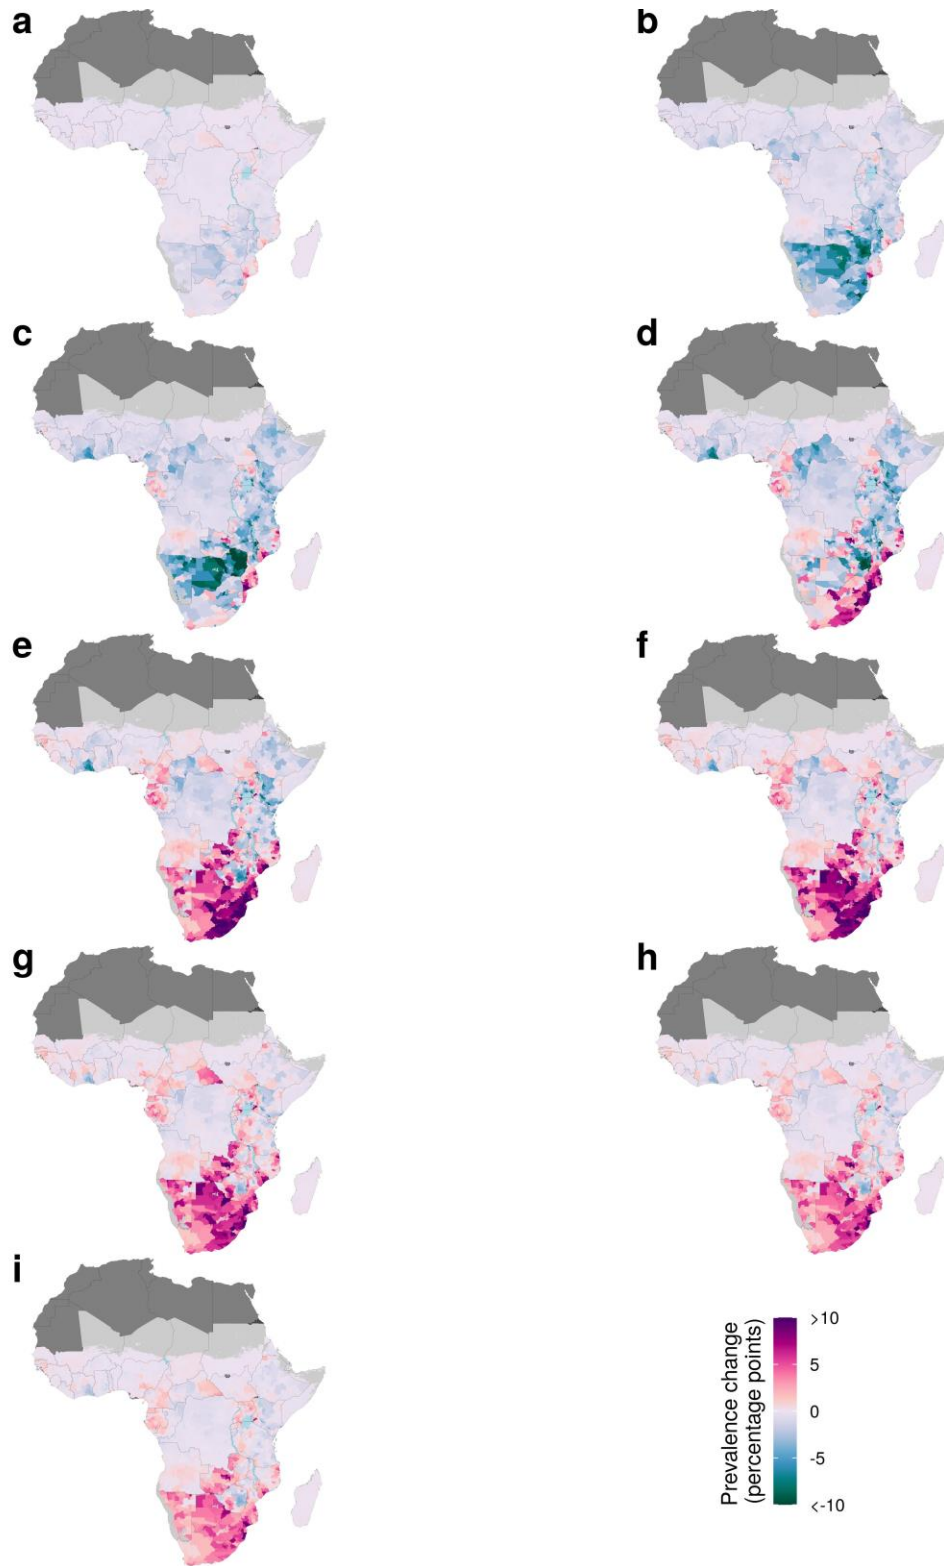

376

377 **Figure S38: Change in HIV prevalence in females, 2005-2010.** Absolute change in female HIV prevalence at  
378 the second administrative level for (a) ages 15–19 years; (b) ages 20-24 years; (c) ages 25-29 years; (d)  
379 ages 30-34 years; (e) ages 35-39 years; (f) ages 40-44 years; (g) ages 45-49 years; (h) ages 50-54 years;  
380 and (i) ages 55-59 years. Maps reflect national boundaries, land cover, lakes, and population; areas with  
381 fewer than ten people per 1 × 1 km, and classified as barren or sparsely vegetated, are colored light grey.  
382 Countries colored in dark grey were not included in the analysis.



383 Figure S39: Change in HIV prevalence in males, 2010–2018

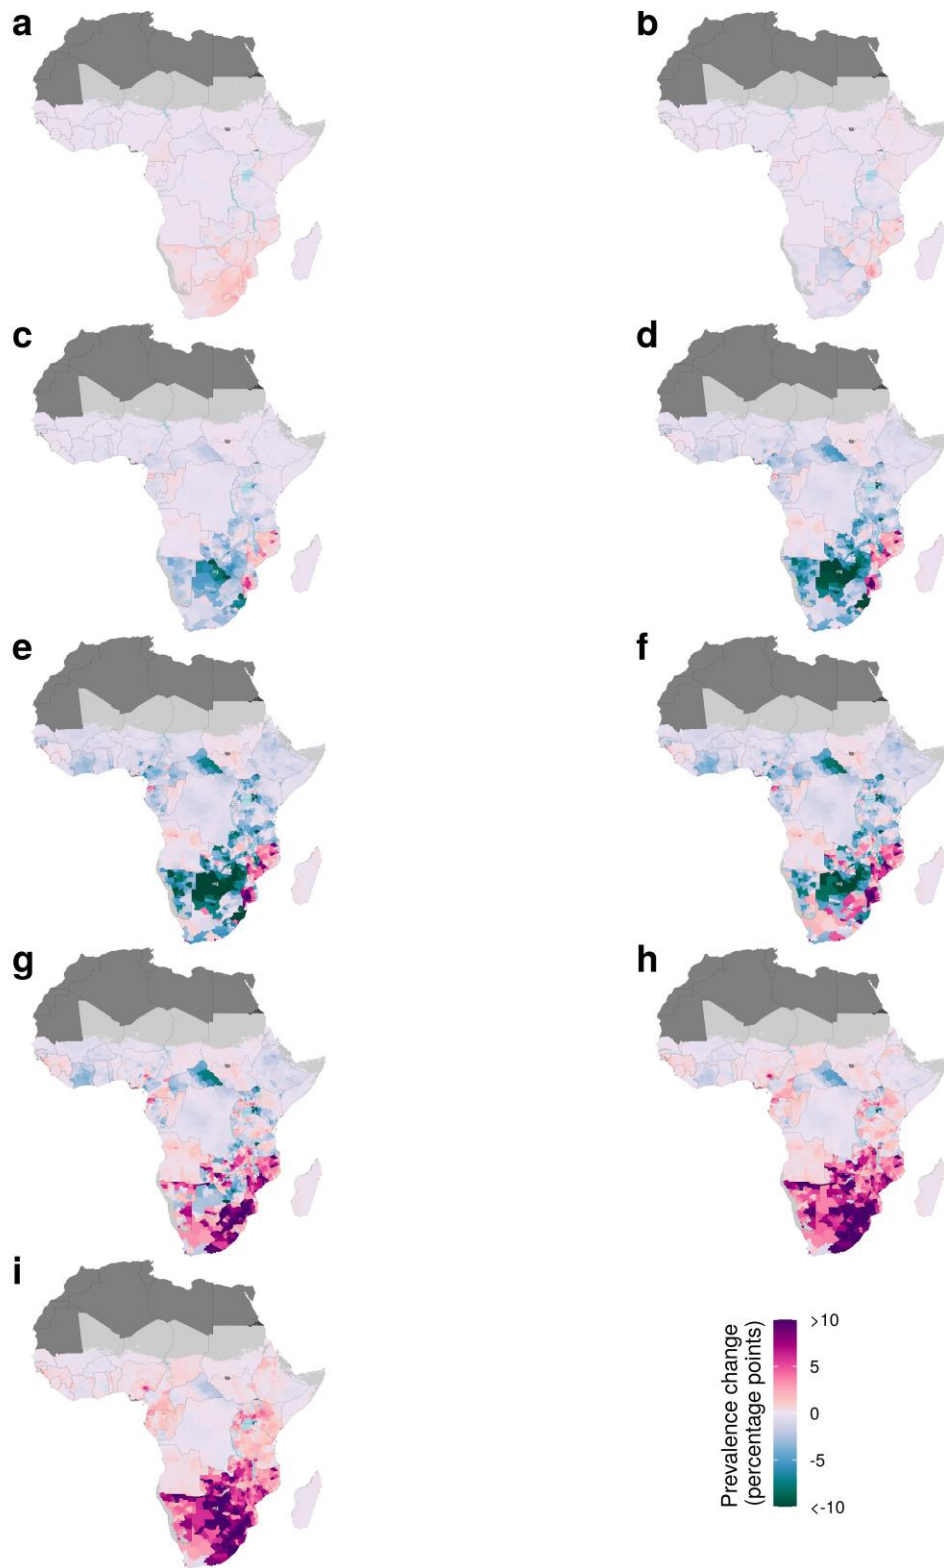

384

385 **Figure S39: Change in HIV prevalence in males, 2010-2018.** Absolute change in male HIV prevalence at the  
386 second administrative level for (a) ages 15–19 years; (b) ages 20-24 years; (c) ages 25-29 years; (d) ages  
387 30-34 years; (e) ages 35-39 years; (f) ages 40-44 years; (g) ages 45-49 years; (h) ages 50-54 years; and (i)  
388 ages 55-59 years. Maps reflect national boundaries, land cover, lakes, and population; areas with fewer  
389 than ten people per 1 × 1 km, and classified as barren or sparsely vegetated, are colored light grey.  
390 Countries colored in dark grey were not included in the analysis.

391 Figure S40: Change in HIV prevalence in females, 2010–2018

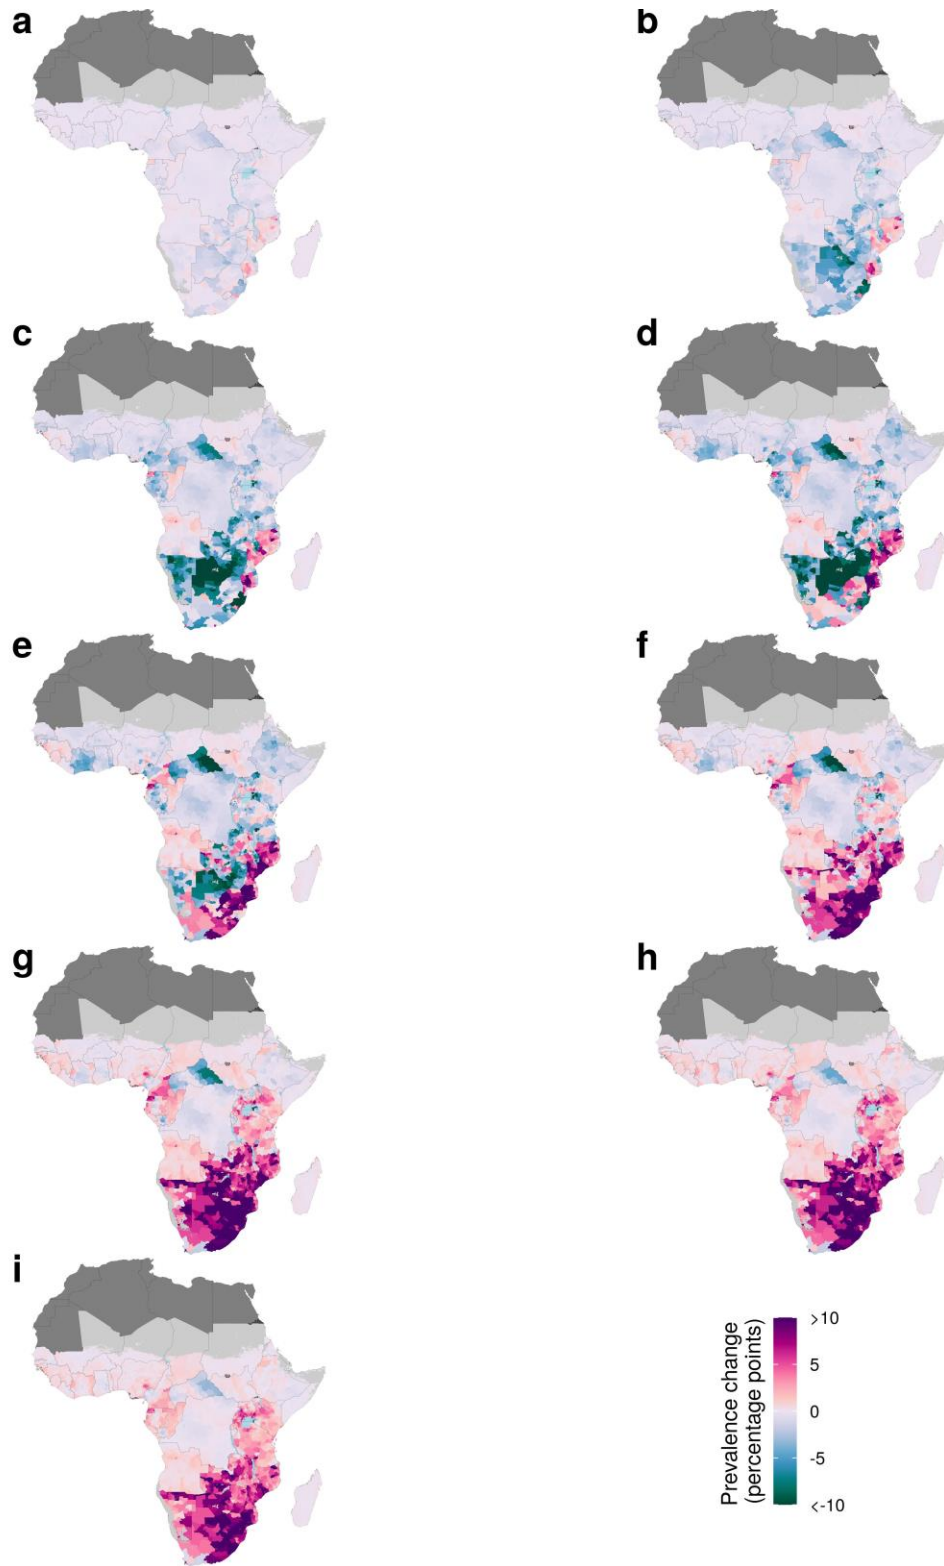

392

393 **Figure S40: Change in HIV prevalence in females, 2010-2018.** Absolute change in female HIV prevalence at  
394 the second administrative level for (a) ages 15–19 years; (b) ages 20-24 years; (c) ages 25-29 years; (d)  
395 ages 30-34 years; (e) ages 35-39 years; (f) ages 40-44 years; (g) ages 45-49 years; (h) ages 50-54 years;  
396 and (i) ages 55-59 years. Maps reflect national boundaries, land cover, lakes, and population; areas with  
397 fewer than ten people per 1 × 1 km, and classified as barren or sparsely vegetated, are colored light grey.  
398 Countries colored in dark grey were not included in the analysis.

399 Figure S41: Spatial mesh for geostatistical models

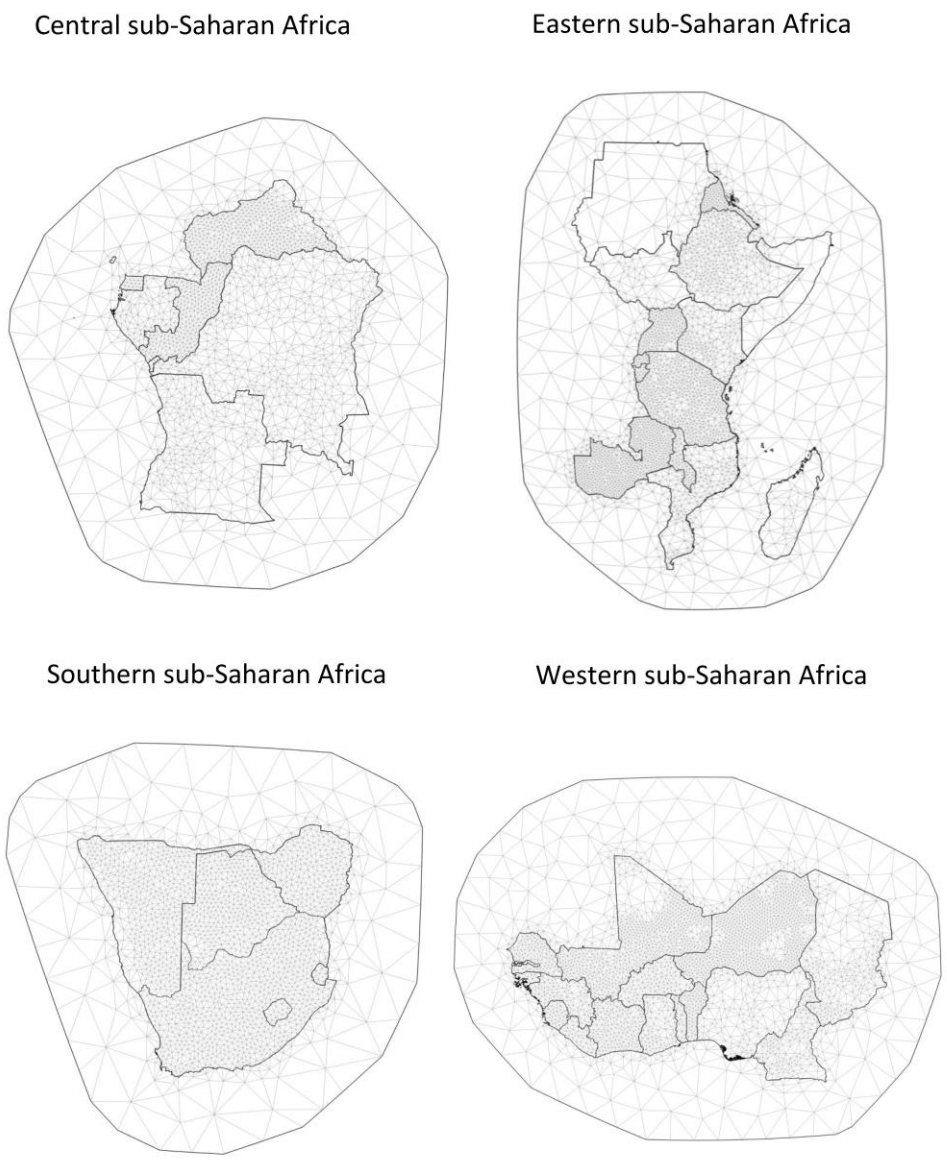

400

401 **Figure S41: Space mesh for geostatistical models.** The finite elements mesh used to fit the space-time  
402 correlated error for each region, overlaid on the countries in that region. Both the fine-scale mesh over  
403 land in the modeling region and the coarser buffer region mesh are shown.
